# Supplementary material for: Technical and Economic Models for a Global Patient co-Owned Cloud (GPOC)
Source: Research Square preprint supplement (doi:10.21203/rs.3.rs-3004979/v1), 2023-07-06
Supplement: Supplementary file 1 [file 30da86da4230a3f0d3d4b532.xlsx]

## Sheet: Table 2 
GPOC Coeffiecient Model
Interactive set of Indicators to GPOC Affiliation, (Good Governance Combined Indicator)
	Score Scale		-2.5	-2	-1	0	0.32699	1	2	2.5	3	4	5	6	7	8	9	10
GPOC Survey	Dominant Indicator	Q27. I think that medical information should accompany/follow patients as a co-owned asset, wherever they move in the world – e.g. on travel, or if the individual becomes displaced as a refugee				No	Neutral	Yes
	Strong Indicator	Q31. I think a global, non-commercial, large and secure cloud, where I co-own my medical record would be an interesting concept				No	Neutral	Yes
		Q32. I think it ought to be possible to globally balance the legal rights and regulations about medical records and find a common ground, and that this would benefit health in general				No	Neutral	Yes
		Q33. I think I personally would benefit from global access and co-ownership and control of my medical records				No	Neutral	Yes
		Q34. A 3 unbiased, decentralised foundation, co-owned by you as a patient, designed to help regulate the flow of your medical information, is something that would be of interest to me				No	Neutral	Yes
		Q35. An infrastructure based on sound scientific and econometric models, with the involvement of patients, governments and institutions from all countries would be worthwhile				No	Neutral	Yes
		Q36. An infrastructure designed by global academics supported by research institutions with the involvement of patients, government and companies, could be founded				No	Neutral	Yes
		Q37. I think an electronic health record can be more environmentally sustainable				No	Neutral	Yes
		Q38. I think a global patient co-owned cloud can be more ecologically advantageous and environmentally sustainable				No	Neutral	Yes
	Moderate Indicator	Q2. I have seen my personal health record.				No	Neutral	Yes
		Q3.1. I have experienced that having access to my own/my family's medical information has:resulted in better healthcare insights.				No	Neutral	Yes
		Q3.2. I have experienced that having access to my own/my family's medical information has:facilitated effective diagnosis				No	Neutral	Yes
		Q3.3. I have experienced that having access to my own/my family's medical information has:facilitated effective treatment				No	Neutral	Yes
		Q4. I have been able to observe incorrect information in my own/family’s medical record				No	Neutral	Yes
		Q5. have sometimes felt that I would like to correct or comment or ask for clarifications in my medical record				No	Neutral	Yes
		Q6. I would like to know if someone has illegally accessed or tampered with my medical record without my consent, and who that person is				No	Neutral	Yes
		Q7. I think that tech giants should be able to use facts in my medical records as much as they intend				Yes	Neutral	No
		Q8. Companies should be able to use my medical records to earn money, without paying me or letting me know				Yes	Neutral	No
	Weak Indicator	Q18.1. I would be willing to allow non-medical research (e.g. consumer product design) using my medical record - if I consented.: With consent				No	Neutral	Yes
		Q18.2. I would be willing to allow non-medical research (e.g. consumer product design) using my medical record - if I consented.: Without consent				Yes	Neutral	No
		Q19.1. I would be willing to allow non-medical research (e.g. consumer product design) using my medical record - if my details were kept anonymously.: Anonymous				No	Neutral	Yes
		Q19.2. I would be willing to allow non-medical research (e.g. consumer product design) using my medical record - if my details were kept anonymously.: Indifferent				Yes	Neutral	No
		Q20.1. I would be willing to allow non-medical research (e.g. consumer product design) using my medical record - if I got paid for it.: Paid				No	Neutral	Yes
		Q20.2. I would be willing to allow non-medical research (e.g. consumer product design) using my medical record - if I got paid for it.: Unpaid3				Yes	Neutral	No
		Q21. I think it is my human right to co-own my medical record with my healthcare provider's at my home country				No	Neutral	Yes
		Q22. I think it is my human right to co-own my medical record with the government				No	Neutral	Yes
		Q24. I think it is my human right to co-own my medical record and share it globally with those I deem relevant				No	Neutral	Yes
		Q26. I think everyone should share their medical records for research for free, if kept anonymous, for humanity				No	Neutral	Yes
		Q28. I think states should own my medical records				Yes	Neutral	No
		Q29. I think states should own my medical records and sell it to whomever they like				Yes	Neutral	No
		Q30. I think states should own my medical records and sell it to whomever they like, ONLY if it generates additional revenue that can be invested into healthcare provision for citizens				Yes	Neutral	No
	Fiscal Interest \ Weak Indicator	Q9.1. I would be willing to allow medical research (clinical) using my medical record - if I consented.: With Consent				No	Neutral	Yes
		Q9.2. I would be willing to allow medical research (clinical) using my medical record - if I consented.: Without Consent				Yes	Neutral	No
		Q10.1. I would be willing to allow medical research (pharmaceutical) using my medical record - if I consented.: With Consent				No	Neutral	Yes
		Q10.2. I would be willing to allow medical research (pharmaceutical) using my medical record - if I consented.: Without Consent				Yes	Neutral	No
		Q11.1. I would be willing to allow medical research (public health) using my medical record - if I consented.: With Consent				No	Neutral	Yes
		Q11.2. I would be willing to allow medical research (public health) using my medical record - if I consented.: Without Consent				Yes	Neutral	No
		Q12.1. I would be willing to allow medical research (clinical) using my medical record - if my details were kept anonymously.: Anonymous				No	Neutral	Yes
		Q12.2. I would be willing to allow medical research (clinical) using my medical record - if my details were kept anonymously. Indifferent				Yes	Neutral	No
		Q13.1. I would be willing to allow medical research (pharmaceutical) using my medical record - if my details were kept anonymously.: Anonymous				No	Neutral	Yes
		Q13.2. I would be willing to allow medical research (pharmaceutical) using my medical record - if my details were kept anonymously.: Indifferent				Yes	Neutral	No
		Q14.1.I would be willing to allow medical research (public health) using my medical record - if my details were kept anonymously.: Anonymous				No	Neutral	Yes
		Q14.2. I would be willing to allow medical research (public health) using my medical record - if my details were kept anonymously.: Indifferent3				Yes	Neutral	No
		Q15.1. I would be willing to allow medical research (clinical) using my medical record - if I got paid for it.: Paid				No	Neutral	Yes
		Q15.2. I would be willing to allow medical research (clinical) using my medical record - if I got paid for it.: Unpaid				Yes	Neutral	No
		Q16.1. I would be willing to allow medical research (pharmaceutical) using my medical record - if I got paid for it.: Paid				No	Neutral	Yes
		Q16.2. I would be willing to allow medical research (pharmaceutical) using my medical record - if I got paid for it.: Unpaid2				Yes	Neutral	No
		Q17.1. I would be willing to allow medical research (public health) using my medical record - if I got paid for it.: Paid				No	Neutral	Yes
		Q17.2. I would be willing to allow medical research (public health) using my medical record - if I got paid for it.: Unpaid				Yes	Neutral	No
Good Governance combined Index		Voice and Accountability index	No				Neutral	Yes
		Political Stability and Absence of Violence/Terrorism index	No				Neutral	Yes
		Government Effectiveness index	No				Neutral	Yes
		Regulatory Quality index	No				Neutral	Yes
		Rule of Law index	No				Neutral	Yes
		Control of Corruption index	No				Neutral	Yes
Extended Good Governance combined Index		Freedom index	No				Neutral	Yes
		Democracy index	No				Neutral	Yes
		Corruption perception index	No				Neutral	Yes
		Happiness index	No				Neutral	Yes
		political rights index	No				Neutral	Yes
		civil liberties index	No				Neutral	Yes
		Morality index	No				Neutral	Yes
		Competitiveness index				0	Neutral	<10%	<20%	<30%	<40%	<50%	<60%	<70%	<80%	<90%	<100%	1
		Gini income inequality index				0	Neutral	<10%	<20%	<30%	<40%	<50%	<60%	<70%	<80%	<90%	<100%	1
		poverty, percent of population index				0	Neutral	<10%	<20%	<30%	<40%	<50%	<60%	<70%	<80%	<90%	<100%	1
Economic, Social and Demographic profile		Domestic general government health expenditure (% of current health expenditure) Share of current health expenditures funded from domestic public sources for health. Domestic public sources include domestic revenue as internal transfers and grants, transfers, subsidies to voluntary health insurance beneficiaries, non-profit institutions serving households (NPISH) or enterprise financing schemes a…				1	Neutral	<10%	<20%	<30%	<40%	<50%	<60%	<70%	<80%	<90%	<100%	1
		Domestic general government health expenditure per capita, PPP (current international B$) Public expenditure on health from domestic sources per capita expressed in international dollars at purchasing power parity.				2	Neutral	<10%	<20%	<30%	<40%	<50%	<60%	<70%	<80%	<90%	<100%	1
		Current health expenditure per capita, PPP (current international $)				3	Neutral	<10%	<20%	<30%	<40%	<50%	<60%	<70%	<80%	<90%	<100%	1
		Current health expenditure per capita (current US$) Current expenditures on health per capita in current US dollars. Estimates of current health expenditures include healthcare goods and services consumed during each year.				4	Neutral	<10%	<20%	<30%	<40%	<50%	<60%	<70%	<80%	<90%	<100%	1
		Current health expenditure (% of GDP) Level of current health expenditure expressed as a percentage of GDP. Estimates of current health expenditures include healthcare goods and services consumed during each year. This indicator does not include capital health expenditures such as buildings, machinery, IT and stocks of vaccines for emergency or outbreaks.				5	Neutral	<10%	<20%	<30%	<40%	<50%	<60%	<70%	<80%	<90%	<100%	1
		International migrant stock, total, International migrant stock is the number of people born in a country other than that in which they live. It also includes refugees. The data used to estimate the international migrant stock at a particular time are obtained mainly from population censuses. The estimates are derived from the data on foreign-born population--people who have residence in one coun…				6	Neutral	<10%	<20%	<30%	<40%	<50%	<60%	<70%	<80%	<90%	<100%	1
		International migrant stock (% of population) International migrant stock is the number of people born in a country other than that in which they live. It also includes refugees. The data used to estimate the international migrant stock at a particular time are obtained mainly from population censuses. The estimates are derived from the data on foreign-born population--people who have residence i…				7	Neutral	<10%	<20%	<30%	<40%	<50%	<60%	<70%	<80%	<90%	<100%	1
		Net migration, Net migration is the net total of migrants during the period, that is, the total number of immigrants less the annual number of emigrants, including both citizens and noncitizens. Data are five-year estimates.				8	Neutral	<10%	<20%	<30%	<40%	<50%	<60%	<70%	<80%	<90%	<100%	1
		Population, total, Total population is based on the de facto definition of population, which counts all residents regardless of legal status or citizenship. The values shown are midyear estimates.				9	Neutral	<10%	<20%	<30%	<40%	<50%	<60%	<70%	<80%	<90%	<100%	1
		GDP (current US$) GDP at purchaser's prices is the sum of gross value added by all resident producers in the economy plus any product taxes and minus any subsidies not included in the value of the products. It is calculated without making deductions for depreciation of fabricated assets or for depletion and degradation of natural resources. Data are in current U.S. dollars. Dollar figures for GDP…				10	Neutral	<10%	<20%	<30%	<40%	<50%	<60%	<70%	<80%	<90%	<100%	1
		GDP (current BillionUS$) Adjusted share GDP at purchaser's prices is the sum of gross value added by all resident producers in the economy plus any product taxes and minus any subsidies not included in the value of the products. It is calculated without making deductions for depreciation of fabricated assets or for depletion and degradation of natural resources. Data are in current U.S. dollars. …				11	Neutral	<10%	<20%	<30%	<40%	<50%	<60%	<70%	<80%	<90%	<100%	1
		Refugee population by country or territory of asylum, Refugees are people who are recognized as refugees under the 1951 Convention Relating to the Status of Refugees or its 1967 Protocol, the 1969 Organization of African Unity Convention Governing the Specific Aspects of Refugee Problems in Africa, people recognized as refugees in accordance with the UNHCR statute, people granted refugee-like hum…				12	Neutral	<10%	<20%	<30%	<40%	<50%	<60%	<70%	<80%	<90%	<100%	1
		Refugee population by country or territory of origin, Refugees are people who are recognized as refugees under the 1951 Convention Relating to the Status of Refugees or its 1967 Protocol, the 1969 Organization of African Unity Convention Governing the Specific Aspects of Refugee Problems in Africa, people recognized as refugees in accordance with the UNHCR statute, people granted refugee-like hum…				13	Neutral	<10%	<20%	<30%	<40%	<50%	<60%	<70%	<80%	<90%	<100%	1
		Refugees and Migrants Integration to HIS total (country of Asylum)				14	Neutral	<10%	<20%	<30%	<40%	<50%	<60%	<70%	<80%	<90%	<100%	1
		Refugees and Migrants Integration to HIS total (Home country)				15	Neutral	<10%	<20%	<30%	<40%	<50%	<60%	<70%	<80%	<90%	<100%	1
		Refugees and Migrants Domestic Healthcare Expendtures (%GDP-PPP)				16	Neutral	<10%	<20%	<30%	<40%	<50%	<60%	<70%	<80%	<90%	<100%	1
		Refugees and Migrants International (current) Healthcare Expendtures(%GDP-ppp)				17	Neutral	<10%	<20%	<30%	<40%	<50%	<60%	<70%	<80%	<90%	<100%	1
		Economic Burden of Healthcare Integration(Refugees and Migrants) (%GDP-Healthcare Bill)				18	Neutral	<10%	<20%	<30%	<40%	<50%	<60%	<70%	<80%	<90%	<100%	1
		Refugees and Migrants Access to subsidized Healthcare services)				19	Neutral	<10%	<20%	<30%	<40%	<50%	<60%	<70%	<80%	<90%	<100%	1
		Economic Burden of Transferred/Infictous Diseases(%GDP)				20	Neutral	<10%	<20%	<30%	<40%	<50%	<60%	<70%	<80%	<90%	<100%	1
		Optimized Domestic general government health expenditure (% of current health expenditure)				21	Neutral	<10%	<20%	<30%	<40%	<50%	<60%	<70%	<80%	<90%	<100%	1
		Optimized Domestic general government health expenditure per capita, PPP (current international B$)				22	Neutral	<10%	<20%	<30%	<40%	<50%	<60%	<70%	<80%	<90%	<100%	1
		Optimized Current health expenditure per capita, PPP (current international $)				23	Neutral	<10%	<20%	<30%	<40%	<50%	<60%	<70%	<80%	<90%	<100%	1
		Optimized Current health expenditure per capita (current US$)				24	Neutral	<10%	<20%	<30%	<40%	<50%	<60%	<70%	<80%	<90%	<100%	1
		Optimized Current health expenditure (% of GDP)				25	Neutral	<10%	<20%	<30%	<40%	<50%	<60%	<70%	<80%	<90%	<100%	1
		Optimized International migrant stock, total				26	Neutral	<10%	<20%	<30%	<40%	<50%	<60%	<70%	<80%	<90%	<100%	1
		Optimized International migrant stock (% of population)				27	Neutral	<10%	<20%	<30%	<40%	<50%	<60%	<70%	<80%	<90%	<100%	1
		Optimized Net migration				28	Neutral	<10%	<20%	<30%	<40%	<50%	<60%	<70%	<80%	<90%	<100%	1
		Optimized Population, total				29	Neutral	<10%	<20%	<30%	<40%	<50%	<60%	<70%	<80%	<90%	<100%	1
		Optimized GDP (current US$)				30	Neutral	<10%	<20%	<30%	<40%	<50%	<60%	<70%	<80%	<90%	<100%	1
		Optimized GDP (current BillionUS$)				31	Neutral	<10%	<20%	<30%	<40%	<50%	<60%	<70%	<80%	<90%	<100%	1
Table 2	Summarises the indicator metrics used for the economic model and the risk score map breakdown that allows the generation of a GPOC co-efficient score. We used economic socio-demographic profiles, Extended and good governance profiles and their combined indices as well as survey indices.

## Sheet: Table 3
classifier		GPOC Ready	GPOC Welcoming	Strongly Approaching GPOC	Moderatly approaching GPOC	Weakly Approaching GPOC	Total GPOC Compliant	Total Non-GPOC Compliant
Non-Fiscal Monetry interest Policies and Demands	GPOC Survay Score Model	15	26	67	41	38	173	94
	Compliant Percentage (%)	8.67052	15.0289	38.7283	23.6994	21.9653	0.7	0.3
	Good Covernance KPIs	0	16	62	46	48	172	95
	Compliant Percentage (%)	0	9.30233	36.0465	26.7442	27.907	0.644195	0.355805
	Extended Good Covernance KPIs	0	30	50	46	46	172	95
	Compliant Percentage (%)	0	17.4419	29.0698	26.7442	26.7442	0.644195	0.355805
	Economic, Social and Demographic profile	0	30	57	40	45	172	95
	Compliant Percentage (%)	0	17.4419	33.1395	23.2558	26.1628	0.644195	0.355052
	GPOC Coefficient Score Model	18	31	72	32	19	172	95
	Compliant Percentage (%)	10.4651	18.0233	41.8605	18.6047	11.0465	0.644195	0.358524
Fiscal Monetry Interest Policies and Demands	GPOC Survay Score Model	228	23	0	0	0	251	16
	Compliant Percentage (%)	90.8367	9.16335	0	0	0	0.644195	0.0599251
	Good Covernance KPIs	214	37	0	0	0	251	16
	Compliant Percentage (%)	85.259	14.741	0	0	0	0.944906	0.0592509
	Extended Good Covernance KPIs	151	100	0	0	0	251	16
	Compliant Percentage (%)	60.1594	39.8406	0	0	0	0.944906	0.0590936
	Economic, Social and Demographic profile	209	42	0	0	0	251	16
	Compliant Percentage (%)	83.2669	16.7331	0	0	0	0.944906	0.0599509
	GPOC Coefficient Risk Score Model	170	81	0	0	0	251	16
	Compliant Percentage (%)	67.7291	32.2709	0	0	0	0.944906	0.0599251
Table 3	Provides a summary of the GPOC coefficient based on fiscal and non-fiscal interests.
							3

## Sheet: Table 4
GPOC Classifier Risk Score Model (Based on Non-Fiscal Monetry interest Policies and Demands)				GPOC Classifier Risk Score Model (Based on Fiscal Monetry Interest Policies and Demands)				Good Covernance KPIs - GPOC Classifier Risk Score Model (Based on Non-Fiscal Monetry interest Policies and Demands)				Good Covernance KPIs - GPOC Classifier Risk Score Model (Based on Fiscal Monetry Interest Policies and Demands)				Extended Good Covernance KPIs - GPOC Classifier Risk Score Model (Based on Non-Fiscal Monetry interest Policies and Demands)				Extended Good Covernance KPIs - GPOC Classifier Risk Score Model (Based on Fiscal Monetry Interest Policies and Demands)				Economic, Social and Demographic profile - GPOC Classifier Risk Score Model (Based on Non-Fiscal Monetry interest Policies and Demands)				Economic, Social and Demographic profile - GPOC Classifier Risk Score Model (Based on Fiscal Monetry Interest Policies and Demands)				GPOC Coefficient Score Model (Based on Non-Fiscal Monetry interest Policies and Demands)				GPOC Coefficient Risk Score Model (Based on Fiscal Monetry Interest Policies and Demands)
Number	GPOC Class	Country	Score (Agg Model)	Number	GPOC Class	Country	Score (Agg Model)	Number	GPOC Class	Country	Score (Agg Model)	Number	GPOC Class	Country	Score (Agg Model)	Number	GPOC Class	Country	Score (Agg Model)	Number	GPOC Class	Country	Score (Agg Model)	Number	GPOC Class	Country	Score (Agg Model)	Number	GPOC Class	Country	Score (Agg Model)	Number	GPOC Class	Country	Score (Agg Model)	Number	GPOC Class	Country	Score (Agg Model)
1	GPOC Ready	Department of Health, South Africa	85	1	GPOC Ready	Tonga	84.327	1	GPOC Welcoming	Bulgaria	81	1	GPOC Ready	Mexico	82	1	GPOC Welcoming	Uganda (Mobiklinic Uganda)	82	1	GPOC Ready	Uganda (Mobiklinic Uganda)	83	1	GPOC Welcoming	Ministerio de Salud de Perú	82	1	GPOC Ready	Mexico	82	1	GPOC Ready	Uganda (Mobiklinic Uganda)	91	1	GPOC Ready	Rwanda	90.327
2		WHO Paris	85	2		Rwanda	84.327	2		CYPRUS	81	2		Rwanda	81.327	2		Ministerio de Salud de Perú	81	2		Ministerio de Salud de Perú	82	2		Uganda (Mobiklinic Uganda)	80	2		Rwanda	79.327	2		Czech Republic	90	2		singapore	89.981
3		Ministerio de Salud de Perú	85	3		Mexico	84	3		Czech Republic	80	3		Peru	81	3		WHO Paris	80	3		WHO Paris	81	3		WHO Paris	79	3		Moldova	78.981	3		Myanmar	90	3		TURKEY	89
4		Lebanon	85	4		Russia	83.654	4		São Tomé and Príncipe	78	4		Namibia	81	4		Myanmar	80	4		Myanmar	81	4		China	78	4		Peru	78	4		WHO Paris	89	4		Guatemala	88.327
5		Slovakia	85	5		Fiji	83.327	5		Panama	78	5		Tonga	79.327	5		Serbia	80	5		Serbia	81	5		Serbia	78	5		Namibia	78	5		Yemen	88	5		Mexico	88
6		Czech Republic	85	6		Nicaragua	83	6		Albania	76	6		Nicaragua	79	6		Nicaragua	80	6		Nicaragua	81	6		Nicaragua	78	6		singapore	77.981	6		Serbia	88	6		Dominican Republic Embassy in Sweden	88
7		Yemen	85	7		Canada	82.981	7		TURKEY	75	7		Bulgaria	79	7		Czech Republic	79	7		Czech Republic	80	7		Bulgaria	78	7		Norway	77.962	7		Dominican Republic Embassy in Sweden	88	7		Moldova	87.981
8		China	85	8		UK	82.981	8		Nicaragua	74	8		Dominican Republic Embassy in Sweden	79	8		Panama	79	8		Panama	80	8		Slovakia	77	8		UK	76.981	8		TURKEY	88	8		India	87.981
9		São Tomé and Príncipe	85	9		Monaco	82.308	9		Algeria	74	9		Albania	78	9		Department of Health, South Africa	78	9		Department of Health, South Africa	79	9		São Tomé and Príncipe	77	9		Fiji	76.327	9		Ministerio de Salud de Perú	87	9		Norway	87.962
10		Madagascar	85	10		United States	82.308	10		Nauru	74	10		CYPRUS	78	10		Yemen	78	10		Yemen	79	10		Panama	77	10		Montenegro	76.308	10		China	87	10		UNESCO	86.635
11		Myanmar	85	11		Bulgaria	82	11		Namibia	73	11		Canada	77.981	11		Mexico	78	11		Mexico	79	11		Algeria	77	11		Dominican Republic Embassy in Sweden	76	11		Panama	87	11		Albania	86
12		Uganda (Mobiklinic Uganda)	85	12		Peru	82	12		Czech Republic, Virtual Clinic Dr. Digital	73	12		United Nations	77.981	12		Slovakia	77	12		Slovakia	78	12		Czech Republic	76	12		TURKEY	76	12		Nicaragua	87	12		UK	85.981
13		Serbia	85	13		Dominican Republic Embassy in Sweden	82	13		Slovakia	72	13		Norway	77.962	13		China	77	13		China	78	13		Yemen	76	13		Mali	75.981	13		Madagascar	86	13		Mali	85.981
14		Panama	85	14		Albania	82	14		Vanuatu	72	14		UNESCO	77.635	14		Mali	77	14		Mali	78	14		CYPRUS	76	14		Monaco	75.308	14		Mali	86	14		Russia	85.654
15		Mali	85	15		Senegal	82	15		Portugal and Cabo Verde	72	15		Fiji	77.327	15		São Tomé and Príncipe	76	15		São Tomé and Príncipe	77	15		Myanmar	75	15		Tunisia	75.308	15		Namibia	86	15		Tonga	85.327
16	GPOC Welcoming	Mexico	84	16		CYPRUS	82	16		India	71	16		Vanuatu	77	16		Madagascar	76	16		Madagascar	77	16		Mexico	75	16		Nicaragua	75	16		Slovakia	85	16		Namibia	85
17		Nicaragua	83	17		Namibia	82	17	Strongly Approching GPOC	Djibouti	70	17		UK	76.981	17		Algeria	76	17		Algeria	77	17		Peru	75	17		Albania	75	17		Bulgaria	85	17		Algeria	85
18		Bulgaria	82	18		Moldova	81.981	18		Egypt	68	18		singapore	76.981	18		Lebanon	75	18		Lebanon	76	18		Namibia	75	18		Algeria	75	18		Albania	85	18		CYPRUS	85
19		Peru	82	19		Mali	81.981	19		Bosnia and Hercegovina	68	19		Kiribati	76.327	19		Senegal	75	19		Senegal	76	19		Department of Health, South Africa	74	19		Canada	74.981	19	GPOC Welcoming	Department of Health, South Africa	84	19		Vanuatu	85
20		Dominican Republic Embassy in Sweden	82	20		Guatemala	81.327	20		Malta	67.635	20		Senegal	76	20		Peru	74	20		Peru	75	20		Lebanon	74	20		India	74.981	20		Lebanon	84	20		Bosnia and Herzegovina	84.943
21		Albania	82	21		Israel	81.327	21		Botswana, Botswana ministry of health	66.981	21		Mali	75.981	21		CYPRUS	74	21		CYPRUS	75	21		Madagascar	74	21		Bosnia and Herzegovina	74.943	21		São Tomé and Príncipe	84	21		International Finance Corporation	84.616
22		Senegal	82	22		Kiribati	81.327	22		Georgia	66.943	22		Russia	75.654	22		Dominican Republic Embassy in Sweden	73	22		Dominican Republic Embassy in Sweden	74	22		Mali	74	22		Federated States of Micronesia	74.635	22		Mexico	84	22		Montenegro	84.308
23		CYPRUS	82	23		TURKEY	81	23		Equatorial Guinea	66.635	23		Federated States of Micronesia	75.635	23		Albania	73	23		Albania	74	23		Dominican Republic Embassy in Sweden	74	23		Danske Regioner	74.616	23		Peru	84	23		Monaco	84.308
24		Namibia	82	24		Algeria	81	24		Kyrgyzstan	66	24		Monaco	75.308	24		Vanuatu	72	24		Vanuatu	73	24		Albania	73	24		Tonga	74.327	24		Senegal	84	24		United States	84.308
25		TURKEY	81	25		Ministerio de Salud y Deportes de Bolivia	80.962	25		Philippines	66	25		United States	75.308	25		Czech Republic, Virtual Clinic Dr. Digital	72	25		Czech Republic, Virtual Clinic Dr. Digital	73	25		TURKEY	73	25		Guatemala	74.327	25		CYPRUS	83	25		Peru	84
26		Algeria	81	26		Norway	80.962	26		Zimbabwe	65.597	26		Tunisia	75.308	26		Bulgaria	71	26		Bulgaria	72	26		Bosnia and Hercegovina	73	26		Romania	74.327	26		Nauru	83	26		Canada	83.981
27		Vanuatu	79	27		Federated States of Micronesia	80.635	27		Afghanistan (former resident KOL)	64.962	27		TURKEY	75	27		Namibia	71	27		Namibia	72	27		Senegal	72	27		Indonesia	74.289	27		Czech Republic, Virtual Clinic Dr. Digital	82	27		Israel	83.981
28		Nauru	79	28		Taiwan	80.289	28		Sri Lanka	64.597	28		Egypt	75	28		TURKEY	71	28		TURKEY	72	28		Vanuatu	72	28		CYPRUS	74	28		Vanuatu	81	28		Ministerio de Salud y Deportes de Bolivia	83.962
29		Portugal and Cabo Verde	78	29		Israel	79.981	29		WHO Liberia	64.559	29		Embassy of Sweden in Ouagadougou, Burkina Faso	74.981	29		Nauru	71	29		Nauru	72	29		Nauru	71	29		Ministerio de Salud y Deportes de Bolivia	73.962	29		Portugal and Cabo Verde	81	29		Jordan	83.962
30		Egypt	77	30		India	79.981	30		Armenia	63.981	30		Dominican Republic	74.943	30		Bosnia and Hercegovina	71	30		Bosnia and Hercegovina	72	30		Egypt	71	30		Malaysia	73.962	30		Bosnia and Hercegovina	81	30		Federated States of Micronesia	83.635
31		Bosnia and Hercegovina	76	31		singapore	79.981	31		Antigua and Barbuda	63.943	31		Guatemala	74.327	31	Strongly Approching GPOC	India	69	31		India	70	31	Strongly Approching GPOC	Djibouti	70	31		Russia	73.654	31		Algeria	80	31		Israel	83.327
32		Czech Republic, Virtual Clinic Dr. Digital	76	32		United Nations	79.981	32		Algeria	63.905	32		Israel	74.327	32		Egypt	68	32		Egypt	69	32		Portugal and Cabo Verde	69	32		UNESCO	73.635	32		India	80	32		Tunisia	83.308
33		India	76	33		Embassy of Sweden in Ouagadougou, Burkina Faso	79.981	33		ICRC	63.829	33		Montenegro	74.308	33		Djibouti	68	33		Djibouti	69	33		India	68	33		International Finance Corporation	73.616	33		Djibouti	79	33		Mexico	83.308
34		Djibouti	76	34		Danske Regioner	79.616	34		Government of Sierra Leone Ministry of Health and Sanitation	63.578	34		Mexico	74.308	34		Portugal and Cabo Verde	67	34		Portugal and Cabo Verde	68	34		Kyrgyzstan	68	34		Israel	73.327	34		Egypt	77	34		Indonesia	83.289
35		Kyrgyzstan	75	35		International Finance Corporation	79.616	35		Colombia	63.54	35		Taiwan	74.289	35		Kyrgyzstan	66	35		Kyrgyzstan	67	35		Malta	65.635	35		Taiwan	73.289	35		Kyrgyzstan	76	35		Kyrgyzstan	83
36		Philippines	73	36		Africa Health Organisation (Tanzania Office)	79.616	36		Portugal	63.27	36		Nauru	74	36		Cuba	65.905	36		Cuba	66.905	36		Czech Republic, Virtual Clinic Dr. Digital	65	36		Bulgaria	73	36		Georgia	74.943	36		Venezuela	82.905
37		Georgia	69.943	37		Tunisia	79.308	37		Tanzania	63.175	37		Portugal and Cabo Verde	74	37		Portugal	65.27	37		Portugal	66.27	37		Georgia	64.943	37		Vanuatu	73	37		Afghanistan (former resident KOL)	73.962	37		Danske Regioner	82.616
38		Malta	69.635	38		Montenegro	79.308	38		Cuba	62.905	38		MSF internat.	73.924	38		Benin	63.962	38		Benin	64.962	38		Afghanistan (former resident KOL)	63.962	38		Embassy of Sweden in Ouagadougou, Burkina Faso	72.981	38		Dominica	73.867	38		Fiji	82.327
39		WHO Liberia	69.559	39		Indonesia	79.289	39		Germany	62.867	39		Danske Regioner	73.616	39		Georgia	63.943	39		Georgia	64.943	39		Dominica	63.867	39		Jordan	72.962	39		Equatorial Guinea	73.635	39		Global work against Female Genital Mutilation	82.327
40		Portugal	69.27	40		Vanuatu	79	40		Croatia	62.578	40		Republic of Belarus	73.597	40		Philippines	63	40		Philippines	64	40		Equatorial Guinea	63.635	40		Venezuela	72.905	40		WHO Liberia	73.559	40		Nicaragua	82
41		Morocco	69.213	41		Nauru	79	41		Guiné-Bissau	62.54	41		The Netherlands HM	73.578	41		Botswana, Botswana ministry of health	62.981	41		Botswana, Botswana ministry of health	63.981	41		WHO Liberia	63.559	41		Tunisia	72.597	41		Philippines	73	41		New Zealand	81.962
42	Strongly Approching GPOC	Suriname	69	42		France	78.981	42		United States of America	62.308	42		Indonesia	73.289	42		Antigua and Barbuda	62.943	42		Antigua and Barbuda	63.943	42		Philippines	63	42		Kiribati	72.327	42		Cuba	72.905	42		Vatican City	81.578
43		Afghanistan (former resident KOL)	68.962	43		Bosnia and Herzegovina	78.943	43		Morocco	62.213	43		Moldova	72.981	43		Malta	62.635	43		Malta	63.635	43		Cuba	62.905	43		United States	72.308	43		Germany	72.867	43		Taiwan	81.289
44		Antigua and Barbuda	68.943	44		Dominican Republic	78.943	44		Ethiopia/Health Poverty Action	61.924	44		India	72.981	44		Sri Lanka	62.597	44		Sri Lanka	63.597	44		Germany	62.867	44		Senegal	72	44		Portugal	72.27	44		Malaysia	80.962
45		Cuba	68.905	45		UNESCO	78.635	45		Saint Kitts and Nevis	61.559	45		France	72.981	45		Croatia	62.578	45		Croatia	63.578	45		Portugal	62.27	45		Kyrgyzstan	72	45		Armenia	71.981	45		MSF internat.	80.924
46		Equatorial Guinea	68.635	46		Romania	78.327	46		El Salvador, MoH	61.327	46		Ministerio de Salud y Deportes de Bolivia	72.962	46		United States of America	62.308	46		United States of America	63.308	46		Armenia	61.981	46		Israel	71.981	46		Algeria	71.905	46		Tunisia	80.597
47		Government of Sierra Leone Ministry of Health and Sanitation	68.578	47		Global work against Female Genital Mutilation	78.327	47		Bangladesh	61.327	47		New Zealand	72.962	47		Morocco	62.213	47		Morocco	63.213	47		Algeria	61.905	47		Antigua	71.962	47		Ethiopia/Health Poverty Action	70.924	47		Trinidad & Tobago	80.597
48		Croatia	68.578	48		Portugal and Cabo Verde	78	48		Suriname	61	48		Libya	72.924	48		Ethiopia/Health Poverty Action	61.924	48		Ethiopia/Health Poverty Action	62.924	48		Ethiopia/Health Poverty Action	60.924	48		Nauru	71	48		Guiné-Bissau	70.54	48		Uruguay	80.578
49		El Salvador, MoH	68.327	49		Libya	77.635	49		Eritrea	60.867	49		Libya	72.635	49		WHO Liberia	61.559	49		WHO Liberia	62.559	49		Guiné-Bissau	60.54	49		Czech Republic, Virtual Clinic Dr. Digital	71	49		Morocco	70.213	49		Burundi	80.578
50		Armenia	67.981	50		Tunisia	77.597	50		Timor-Leste	60.194	50		International Finance Corporation	72.616	50		Colombia	61.54	50		Colombia	62.54	50		Poland (good initiative - last week a record of refugees)	60.232	50		New Zealand	70.962	50	Strongly Approching GPOC	Botswana, Botswana ministry of health	69.981	50		Romania	80.327
51		Botswana, Botswana ministry of health	67.981	51		Mexico	77.308	51		Myanmar	60	51		Bahamas	72.578	51		El Salvador, MoH	61.327	51		El Salvador, MoH	62.327	51		Morocco	60.213	51		Switzerland	70.924	51		Honduras	69.905	51		Amnesty International in Sweden	80.289
52		Benin	67.962	52		Egypt	77	52		Bhutan	59.886	52		Global work against Female Genital Mutilation	72.327	52		Bangladesh	61.327	52		Bangladesh	62.327	52		Timor-Leste	60.194	52		Africa Health Organisation (Tanzania Office)	70.616	52		ICRC	69.829	52		Bulgaria	80
53		Ethiopia/Health Poverty Action	67.924	53		New Zealand	76.962	53		Dominica	59.867	53		Algeria	72	53		Suriname	61	53		Suriname	62	53		Botswana, Botswana ministry of health	59.981	53		Uruguay	70.578	53		mauritania	69.829	53		Egypt	80
54		Algeria	67.905	54		Antigua	76.962	54		Ministry of Health & Wellness, Jamaica	59.213	54		Bosnia and Hercegovina	72	54		Algeria	60.905	54		Algeria	61.905	54		Honduras	59.905	54		Vatican City	70.578	54		Government of Sierra Leone Ministry of Health and Sanitation	69.578	54		Philippines	80
55		Germany	67.867	55		Jordan	76.962	55		Benin	58.962	55		Armenia	71.981	55		Embassy of Sweden - UAE	60.848	55		Embassy of Sweden - UAE	61.848	55		ICRC	59.829	55		Global work against Female Genital Mutilation	70.327	55		Colombia	69.54	55		Antigua	79.962
56		Dominica	67.867	56		Malaysia	76.962	56		Austria	58.943	56		Antigua	71.962	56		mauritania	60.829	56		mauritania	61.829	56		mauritania	59.829	56		Mexico	70.308	56		Venezuela	69.175	56		japan	79.962
57		Sri Lanka	67.597	57		MSF internat.	76.924	57		Montenegro	58.924	57		Bosnia and Herzegovina	71.943	57		Government of Sierra Leone Ministry of Health and Sanitation	60.578	57		Government of Sierra Leone Ministry of Health and Sanitation	61.578	57		Government of Sierra Leone Ministry of Health and Sanitation	59.578	57		Paraguay	70.251	57		Suriname	69	57		Switzerland	79.924
58		Zimbabwe	67.597	58		South Africa	76.924	58		Qatar	58.848	58		Switzerland	71.924	58		Afghanistan (former resident KOL)	59.962	58		Afghanistan (former resident KOL)	60.962	58		Colombia	59.54	58		Danish Embassy, Stockholm	70.251	58		Benin	68.962	58		Libya	79.924
59		Colombia	67.54	59		Libya	76.924	59		COSTA RICA	58.848	59		Africa Health Organisation (Tanzania Office)	71.616	59		Honduras	59.905	59		Honduras	60.905	59		Suriname	59	59		Bosnia and Hercegovina	70	59		Montenegro	68.924	59		Saint Lucia	79.905
60		United States of America	67.308	60		Republic of Belarus	76.597	60		CHAI , Zimbabwe	58.464	60		The Gambia	71.308	60		Austria	58.943	60		Austria	59.943	60		Benin	58.962	60		United Nations	69.981	60		Eritrea	68.867	60		United Arab Emirates	79.616
61		Bhutan	66.886	61		US	76.327	61		Population Services International	57.962	61		Tchad	71.232	61		Germany	58.867	61		Germany	59.867	61		Montenegro	58.924	61		France	69.981	61		Croatia	68.578	61		Kiribati	79.327
62		Qatar	66.848	62		MSF	76.251	62		Honduras	57.905	62		Djibouti	71	62		COSTA RICA	58.848	62		COSTA RICA	59.848	62		Croatia	58.578	62		Andorra	69.962	62		United States of America	68.308	62		Bosnia and Hercegovina	79
63		ICRC	66.829	63		Paraguay	76.251	63		Egypt	57.886	63		Israel	70.981	63		Guiné-Bissau	58.54	63		Guiné-Bissau	59.54	63		Tajikistan	58.483	63		Libya	69.924	63		Greece	68.175	63		Pakistan	78.905
64		mauritania	66.829	64		Bosnia and Hercegovina	76	64		Ecuador	57.867	64		Venezuela	70.905	64		Armenia	57.981	64		Armenia	58.981	64		United States of America	58.308	64		Saint Lucia	69.905	64		Bhutan	67.886	64		Africa Health Organisation (Tanzania Office)	78.616
65		Guiné-Bissau	66.54	65		Czech Republic, Virtual Clinic Dr. Digital	76	65		Italia	57.829	65		Czech Republic, Virtual Clinic Dr. Digital	70	65		Bhutan	57.886	65		Bhutan	58.886	65		Bhutan	57.886	65		Burundi	69.578	65		Ecuador	67.867	65		Republic of Belarus	78.597
66		Tanzania	66.175	66		India	76	66		Switzerland	57.81	66		Jamaica	69.981	66		Dominica	57.867	66		Dominica	58.867	66		Ecuador	57.867	66		The Gambia	69.308	66		Embassy of Sweden - UAE	67.848	66		Democratic Republic of Congo	78.27
67		Austria	65.943	67		Djibouti	76	67		Nepal	57.616	67		Jordan	69.962	67		Tanzania	57.81	67		Tanzania	58.81	67		Embassy of Sweden - UAE	57.848	67		Portugal and Cabo Verde	69	67		Tanzania	67.81	67		Brazil	78.251
68		Honduras	65.905	68		Switzerland	75.924	68		Poland (good initiative - last week a record of refugees)	57.232	68		Estonia	69.905	68		Equatorial Guinea	57.635	68		Equatorial Guinea	58.635	68		COSTA RICA	57.848	68		Egypt	69	68		Sri Lanka	67.597	68		Nauru	78
69		Embassy of Sweden - UAE	65.848	69		Bahamas	75.578	69		Embassy of Sweden - UAE	56.848	69		Saint Lucia	69.905	69		CHAI , Zimbabwe	57.464	69		CHAI , Zimbabwe	58.464	69		Sri Lanka	57.597	69		World Economic Forum	68.981	69		El Salvador, MoH	67.327	69		United Nations	77.981
70		Bangladesh	65.327	70		The Netherlands HM	75.578	70		Hungary	56.308	70		United Arab Emirates	69.616	70		Poland (good initiative - last week a record of refugees)	57.232	70		Poland (good initiative - last week a record of refugees)	58.232	70		El Salvador, MoH	57.327	70		Jamaica	68.981	70		Belize	67	70		France	77.981
71		Montenegro	64.924	71		Uruguay	75.578	71		Greece	56.175	71		Tunisia	69.597	71		Tanzania	57.175	71		Tanzania	58.175	71		Center for Security and Emerging Technology	57.251	71		United Arab Emirates	68.616	71		Austria	66.943	71		World Economic Forum	77.981
72		Ecuador	64.867	72		Burundi	75.578	72		Venezuela	56.175	72		Lesotho	69.559	72		Directorate of Health, Iceland	56.962	72		Directorate of Health, Iceland	57.962	72		Directorate of Health, Iceland	56.962	72		Republic of Belarus	68.597	72		Qatar	66.848	72		Armenia	77.981
73		Ministry of Health & Wellness, Jamaica	64.213	73		Amnesty International in Sweden	75.289	73		Serbia	56	73		Romania	69.327	73		Qatar	56.848	73		Qatar	57.848	73		Austria	56.943	73		Bahamas	68.578	73		Malta	66.635	73		Estonia	77.905
74		Timor-Leste	64.194	74		Kyrgyzstan	75	74		mauritania	55.829	74		US	69.327	74		SLOVENIA	56.54	74		SLOVENIA	57.54	74		Eritrea	56.867	74		US	68.327	74		Zimbabwe	66.597	74		Mauritius	77.886
75		Eritrea	63.867	75		World Economic Forum	74.981	75		Tanzania	55.81	75		Amnesty International in Sweden	69.289	75		Tajikistan	56.483	75		Tajikistan	57.483	75		Qatar	56.848	75		Amnesty International in Sweden	68.289	75		Saint Kitts and Nevis	66.559	75		Paraguay	77.251
76		Saint Kitts and Nevis	63.559	76		Togo	74.962	76		SLOVENIA	55.54	76		Republic of Palau	69.289	76		Center for Security and Emerging Technology	56.251	76		Center for Security and Emerging Technology	57.251	76		Zimbabwe	56.597	76		Brazil	68.251	76		Tajikistan	66.483	76		MSF	77.251
77		SLOVENIA	63.54	77		Estonia	74.905	77		Papua New Guinea	55.213	77		Danish Embassy, Stockholm	69.251	77		Ministry of Health & Wellness, Jamaica	56.213	77		Ministry of Health & Wellness, Jamaica	57.213	77		Hungary	56.308	77		Tchad	68.232	77		Tanzania	66.175	77		Tchad	77.232
78		Center for Security and Emerging Technology	63.251	78		Saint Lucia	74.905	78		Belize	55	78		India	69	78		ICRC	55.829	78		ICRC	56.829	78		Papua New Guinea	56.213	78		Djibouti	68	78		Directorate of Health, Iceland	65.962	78		South Korea	77.232
79		Poland (good initiative - last week a record of refugees)	63.232	79		Venezuela	74.905	79	Moderatly approching GPOC	Directorate of Health, Iceland	54.962	79		Malaysia	68.962	79		Papua New Guinea	55.213	79		Papua New Guinea	56.213	79		Ministry of Health & Wellness, Jamaica	56.213	79		Togo	67.962	79		Antigua and Barbuda	65.943	79		Somalia	77.232
80		Greece	63.175	80		Swedish National Committee of UNICEF Sweden	74.597	80		Tajikistan	54.483	80		japan	68.962	80		Timor-Leste	55.194	80		Timor-Leste	56.194	80		Tanzania	56.175	80		japan	67.962	80		SLOVENIA	65.54	80		Czech Republic, Virtual Clinic Dr. Digital	77
81		Venezuela	63.175	81		Iran	74.327	81		Center for Security and Emerging Technology	54.251	81		Trinidad & Tobago	68.597	81	Moderatly approching GPOC	Population Services International	54.962	81		Population Services International	55.962	81		Population Services International	55.962	81		MSF internat.	67.924	81		Bangladesh	65.327	81		Portugal and Cabo Verde	77
82		Directorate of Health, Iceland	62.962	82		Jamaica	73.981	82		Mali	54	82		Democratic Republic of Congo	68.27	82		Montenegro	54.924	82		Montenegro	55.924	82		Antigua and Barbuda	55.943	82		Mauritius	67.886	82		Papua New Guinea	65.213	82		Embassy of Sweden in Ouagadougou, Burkina Faso	76.981
83		Population Services International	62.962	83		Grenada	73.635	83		Belize	54	83		MSF	68.251	83		Eritrea	54.867	83		Eritrea	55.867	83		Tanzania	55.81	83		Libya	67.635	83		Population Services International	64.962	83		Andorra	76.962
84		Egypt	62.886	84		Singapore	73.308	84		Kazakhstan	53.867	84		Brazil	68.251	84		Zimbabwe	54.597	84		Zimbabwe	55.597	84		Nepal	55.616	84		Grenada	67.635	84		Nigeria	64.445	84		Dominican Republic	76.943
85		COSTA RICA	62.848	85		The Gambia	73.308	85		Kenya	53.848	85		Kyrgyzstan	68	85		Venezuela	54.175	85		Venezuela	55.175	85		Saint Kitts and Nevis	55.559	85		Iran	67.327	85		Poland (good initiative - last week a record of refugees)	64.232	85		Cuba	76.905
86		Tajikistan	62.483	86		Danish Embassy, Stockholm	73.251	86		Chile	53.81	86		Philippines	68	86		Egypt	53.886	86		Egypt	54.886	86		Bangladesh	55.327	86		Democratic Republic of Congo	67.27	86		Timor-Leste	64.194	86		Libya	76.635
87		Papua New Guinea	62.213	87		Brazil	73.251	87		Malawi	53.791	87		World Economic Forum	67.981	87		Ecuador	53.867	87		Ecuador	54.867	87		Venezuela	55.175	87		MSF	67.251	87		Belize	64	87		The Gambia	76.308
88		Switzerland	61.81	88		Eswatini	73.251	88		Mauritius	53.521	88		Pakistan	67.905	88		Kenya	53.848	88		Kenya	54.848	88	Moderatly approching GPOC	SLOVENIA	54.54	88		India	67	88		Egypt	63.886	88		Singapore	76.308
89		Tanzania	61.81	89		Tchad	73.232	89		Republic of Congo	52.867	89		Grenada	67.635	89		Switzerland	53.81	89		Switzerland	54.81	89		Kenya	53.848	89		Philippines	67	89		Kenya	63.848	89		Danish Embassy, Stockholm	76.251
90		Kenya	60.848	90		Philippines	73	90		Mozambique	52.635	90		Uruguay	67.578	90		Saint Kitts and Nevis	53.559	90		Saint Kitts and Nevis	54.559	90		International Federation of RedCross RedCrescent/Swedish Red Cross in DPR Korea (North ..	53.27	90		Dominican Republic	66.943	90		Switzerland	63.81	90		Republic of Belarus	76.213
91		CHAI , Zimbabwe	60.464	91		Armenia	72.981	91		Democratic Republic of Congo	52.521	91		Iran	67.327	91		Democratic Republic of Congo	53.521	91		Democratic Republic of Congo	54.521	91		Belize	53	91		Kuwait University	66.943	91		Mauritius	63.521	91		Senegal	76
92		Hungary	60.308	92		Andorra	72.962	92		Côte d'ivoire	52.502	92		Paraguay	67.251	92		International Federation of RedCross RedCrescent/Swedish Red Cross in DPR Korea (North ..	53.27	92		International Federation of RedCross RedCrescent/Swedish Red Cross in DPR Korea (North ..	54.27	92		Egypt	52.886	92		South Africa	66.924	92		Ministry of Health & Wellness, Jamaica	63.213	92		India	76
93		Belize	60	93		Kuwait University	72.943	93		Belgium	52.08	93		Eswatini	67.251	93		Greece	53.175	93		Greece	54.175	93		Kazakhstan	52.867	93		Estonia	66.905	93		COSTA RICA	62.848	93		Jamaica	75.981
94		Belize	60	94		Pakistan	72.905	94		barbados	51.791	94		Togo	66.962	94		Belize	53	94		Belize	54	94		barbados	52.791	94		Trinidad & Tobago	66.597	94		Nepal	62.616	94		Togo	75.962
95		Italia	59.829	95		Mongolia	72.886	95		Oman	51.426	95		Algeria	66.962	95		barbados	52.791	95		barbados	53.791	95		Mauritius	52.521	95		The Netherlands HM	66.578	95		CHAI , Zimbabwe	62.464	95		Kuwait University	75.943
96		Kazakhstan	58.867	96		Mauritius	72.886	96		Italy	51.213	96		Kuwait University	66.943	96		Mauritius	52.521	96		Mauritius	53.521	96		CHAI , Zimbabwe	52.464	96		Maldives National University, School of Medicine	66.578	96		Center for Security and Emerging Technology	62.251	96		Mongolia	75.886
97		Nepal	58.616	97		Vatican City	72.578	97		Australia	50.578	97		Georgia	66.943	97		Sharda University Uzbekistan	52.388	97		Sharda University Uzbekistan	53.388	97		Greece	52.175	97		South Korea	66.232	97		Italy	62.213	97		Dominica	75.867
98		Australia	58.578	98		ALGERIA	72.289	98		Nigeria	50.445	98		Algeria	66.905	98		Belize	52	98		Belize	53	98		Belize	52	98		Republic of Belarus	66.213	98		Australia	61.578	98		Grenada	75.635
99		Democratic Republic of Congo	58.521	99		Republic of Palau	72.289	99		Vietnam	49.502	99		Swedish National Committee of UNICEF Sweden	66.597	99		Republic of Congo	51.867	99		Republic of Congo	52.867	99		Switzerland	51.81	99		Armenia	65.981	99		Côte d'ivoire	61.502	99		Hungary	75.597
100		Mauritius	58.521	100		Democratic Republic of Congo	72.27	100		Sharda University Uzbekistan	49.388	100		Burundi	66.578	100		Nepal	50.616	100		Poland (good initiative - last week a record of refugees)	52.232	100		Nigeria	51.445	100		Armenia	65.981	100		Hungary	61.308	100		Maldives National University, School of Medicine	75.578
101		Nigeria	58.445	101		Republic of Belarus	72.213	101		Republic of Marshall Islands	49.232	101		Vatican City	66.578	101		Côte d'ivoire	50.502	101		Samoa	52.137	101		Republic of Congo	50.867	101		Pakistan	65.905	101		Kazakhstan	60.867	101		US	75.327
102		Italy	58.213	102		Population Services International (PSI)	72.213	102		MOH Malaysia	49.061	102		Singapore	66.308	102		Hungary	50.308	102		Nepal	51.616	102		Italia	50.829	102		Cuba	65.905	102		barbados	60.791	102		Suriname	75
103		barbados	57.791	103		japan	71.962	103		Lithuania	48.635	103		United States of America	66.308	103		Kazakhstan	49.867	103		Côte d'ivoire	51.502	103		Chile	50.81	103		Hungary	65.597	103		Oman	60.426	103		South Africa	74.924
104		International Federation of RedCross RedCrescent/Swedish Red Cross in DPR Korea (North ..	57.27	104		United Arab Emirates	71.616	104		International Federation of RedCross RedCrescent/Swedish Red Cross in DPR Korea (North ..	48.27	104		Ukraine - Slava Ukraini!!!	66.232	104		Italia	49.829	104		Hungary	51.308	104		Democratic Republic of Congo	50.521	104		Republic of Palau	65.289	104		GABON	59.886	104		ICRC	74.829
105		Chile	56.81	105		South Korea	71.232	105		Guyana	47.962	105		Afghanistan (former resident KOL)	65.962	105		Nigeria	49.445	105		Kazakhstan	50.867	105		Oman	50.426	105		Portugal	65.27	105		Samoa	59.137	105		Swedish National Committee of UNICEF Sweden	74.597
106		Côte d'ivoire	56.502	106		Algeria	70.962	106		GABON	47.886	106		South Africa	65.924	106		Lithuania	48.635	106		Italia	50.829	106		Eswatini	49.791	106		Somalia	65.232	106		Belgium	59.08	106		Zimbabwe	74.597
107		Republic of Marshall Islands	56.232	107		Lao PDR	70.905	107		Bangladesh	47.867	107		Mauritius	65.886	107		Oman	48.426	107		Nigeria	50.445	107		Côte d'ivoire	49.502	107		Algeria	64.962	107		Republic of Congo	58.867	107		Bahamas	74.578
108		GABON	55.886	108		Poland	70.654	108		Eswatini	47.791	108		Maldives National University, School of Medicine	65.578	108		Republic of Marshall Islands	48.232	108		Italy	50.213	108		Italy	48.213	108		Mongolia	64.886	108		Italia	58.829	108		Iran	74.327
109	Moderatly approching GPOC	Republic of Congo	55.867	109		Trinidad & Tobago	70.597	109		General Directorate of Digital Health and Information Systems for the SNS.Ministry of H..	47.791	109		Government of Sierra Leone Ministry of Health and Sanitation	65.578	109		Italy	48.213	109		Kazakhstan	49.867	109		San Marino	48.099	109		Swedish National Committee of UNICEF Sweden	64.597	109		Democratic Republic of Congo	58.521	109		New Zealand	74.194
110		Malawi	55.791	110		Andorra	70.597	110		State of Palestine	47.753	110		Colombia	65.54	110		Belgium	48.08	110		Lithuania	49.635	110		MOH Malaysia	48.061	110		Sri Lanka	64.597	110		International Federation of RedCross RedCrescent/Swedish Red Cross in DPR Korea (North ..	58.27	110		Djibouti	74
111		Eswatini	55.791	111		Hungary	70.597	111		Sociedad Chilena de Medicina del Trabajo	47.502	111		Portugal	65.27	111		Eswatini	47.791	111		Nigeria	49.445	111		Belize	48.042	111		WHO Liberia	64.559	111		Mozambique	57.635	111		Montenegro	73.924
112		Oman	55.426	112		Maldives National University, School of Medicine	70.578	112		Samoa	47.137	112		Republic of Belarus	65.213	112		Australia	47.578	112		Oman	49.426	112		Iraq	47.616	112		Singapore	64.308	112		San Marino	57.099	112		Algeria	73.905
113		Sharda University Uzbekistan	55.388	113		Lesotho	70.559	113		San Marino	47.099	113		New Zealand	65.194	113		Vietnam	47.502	113		Sharda University Uzbekistan	49.388	113		Australia	47.578	113		Eswatini	64.251	113		Bangladesh	56.867	113		Guiné-Bissau	73.54
114		Samoa	55.137	114		Angola	70.251	114		Solomon Islands	46.867	114		Suriname	65	114		Samoa	47.137	114		Republic of Marshall Islands	49.232	114		Sociedad Chilena de Medicina del Trabajo	47.502	114		Suriname	64	114		Chile	56.81	114		Bangladesh	73.327
115		Belgium	54.08	115		Ukraine - Slava Ukraini!!!	70.232	115		CDC	46.521	115		Andorra	64.962	115		MOH Malaysia	47.061	115		Italy	49.213	115		Republic of Marshall Islands	47.232	115		Dominica	63.867	115		Malawi	56.791	115		Republic of Palau	73.289
116		Belize	54.042	116		Somalia	70.232	116		Belize	46.042	116		Austria	64.943	116		Bangladesh	46.867	116		Belgium	49.08	116		Bangladesh	46.867	116		Malta	63.635	116		Cambodia	56.118	116		Armenia	72.981
117		State of Palestine	53.753	117		New Zealand	70.194	117		Ministry of Health Zambia	46	117		Lao PDR	64.905	117		Chile	46.81	117		Tanzania	48.81	117		Mozambique	46.635	117		El Salvador, MoH	63.327	117		Seychelles Madagascar Comoros and Seychelles for UNAIDS	55.943	117		Ethiopia/Health Poverty Action	72.924
118		Lithuania	53.635	118		Georgia	69.943	118		Taiwan	45.369	118		Mongolia	64.886	118		State of Palestine	46.753	118		Eswatini	48.791	118		Sharda University Uzbekistan	46.388	118		Population Services International (PSI)	63.213	118		Eswatini	55.791	118		Sri Lanka	72.597
119		Mozambique	53.635	119		Malta	69.635	119		Senegal	45	119		Hungary	64.597	119		Sociedad Chilena de Medicina del Trabajo	46.502	119		Australia	48.578	119		GABON	45.886	119		New Zealand	63.194	119		Iraq	55.616	119		The Netherlands HM	72.578
120		Sociedad Chilena de Medicina del Trabajo	53.502	120		WHO Liberia	69.559	120		Serbia	44.905	120		Sri Lanka	64.597	120		Luxembourg	46.483	120		Vietnam	48.502	120		State of Palestine	45.753	120		Tanzania	63.175	120		Sociedad Chilena de Medicina del Trabajo	55.502	120		Lesotho	72.559
121		MOH Malaysia	53.061	121		Portugal	69.27	121		Luxembourg	44.483	121		WHO Liberia	64.559	121		Ministry of Health Zambia	46	121		International Federation of RedCross RedCrescent/Swedish Red Cross in DPR Korea (North ..	48.27	121		Vietnam	45.502	121		Afghanistan (former resident KOL)	62.962	121		Belize	55.042	121		Portugal	72.27
122		Seychelles Madagascar Comoros and Seychelles for UNAIDS	52.943	122		Morocco	69.213	122		Madagascar	44	122		Angola	64.251	122		GABON	45.886	122		Samoa	48.137	122		Samoa	45.137	122		Ethiopia/Health Poverty Action	62.924	122	Moderatly approching GPOC	Guyana	54.962	122		Tanzania	72.175
123		Bangladesh	52.867	123		Suriname	69	123		Peru	44	123		Population Services International (PSI)	64.213	123		Malawi	45.791	123		MOH Malaysia	48.061	123		Guyana	44.962	123		Montenegro	62.924	123		MOH Malaysia	54.061	123		Benin	71.962
124		Vietnam	52.502	124		Afghanistan (former resident KOL)	68.962	124		Ministry of Health Zambia	44	124		Tanzania	64.175	124		Guyana	44.962	124		Bangladesh	47.867	124		General Directorate of Digital Health and Information Systems for the SNS.Ministry of H..	44.791	124		Lao PDR	62.905	124		State of Palestine	53.753	124		Poland	71.654
125		Taiwan	52.369	125		Antigua and Barbuda	68.943	125	Weakly Approching GPOC	Seychelles Madagascar Comoros and Seychelles for UNAIDS	43.943	125		Ethiopia/Health Poverty Action	63.924	125		Mozambique	44.635	125		Italia	47.829	125		Lithuania	44.635	125		Equatorial Guinea	62.635	125		Dominica	53.616	125		Malta	71.635
126		San Marino	52.099	126		Cuba	68.905	126		Dominica	43.616	126		Qatar	63.848	126		CDC	44.521	126		Chile	47.81	126		Taiwan	44.369	126		Zimbabwe	62.597	126		Luxembourg	53.483	126		WHO Liberia	71.559
127		Guyana	51.962	127		Equatorial Guinea	68.635	127		Turkmenistan	43.369	127		Equatorial Guinea	63.635	127	Weakly Approching GPOC	Seychelles Madagascar Comoros and Seychelles for UNAIDS	43.943	127		State of Palestine	47.753	127		Liechtenstein	44.194	127		Lesotho	62.559	127		Republic of Marshall Islands	53.232	127		ALGERIA	71.289
128		Luxembourg	51.483	128		Government of Sierra Leone Ministry of Health and Sanitation	68.578	128		Haiti	42.696	128		Croatia	63.578	128		Solomon Islands	43.867	128		Sociedad Chilena de Medicina del Trabajo	47.502	128	Weakly Approching GPOC	UNCHR Europe	43.521	128		ALGERIA	62.289	128		Serbia	52.905	128		Afghanistan (former resident KOL)	70.962
129		Solomon Islands	50.867	129		Croatia	68.578	129		Iraq	42.616	129		ALGERIA	63.289	129		Dominica	43.616	129		Vietnam	47.502	129		Luxembourg	43.483	129		Georgia	61.943	129		Lithuania	52.635	129		Austria	70.943
130		General Directorate of Digital Health and Information Systems for the SNS.Ministry of H..	50.791	130		El Salvador, MoH	68.327	130		Ipas	42.388	130		South Korea	63.232	130		Liechtenstein	43.194	130		Luxembourg	47.483	130		Belgium	43.08	130		Antigua and Barbuda	61.943	130		UNCHR Europe	52.521	130		Embassy of Sweden - UAE	70.848
131		Iraq	50.616	131		Armenia	67.981	131		Cambodia	42.118	131		Benin	62.962	131		Belize	43.042	131		Hungary	47.308	131		Ministry of Health Zambia	43	131		Algeria	61.905	131		Sharda University Uzbekistan	52.388	131		mauritania	70.829
132		Cambodia	50.118	132		Botswana, Botswana ministry of health	67.981	132		Azerbaijan	41.962	132		Poland	62.654	132		Ministry of Health Zambia	43	132		Ministry of Health Zambia	47	132		Seychelles Madagascar Comoros and Seychelles for UNAIDS	42.943	132		ICRC	61.829	132		Taiwan	52.369	132		Government of Sierra Leone Ministry of Health and Sanitation	70.578
133		Serbia	49.905	133		Benin	67.962	133		Brunei	41.616	133		Malta	62.635	133		Serbia	42.905	133		GABON	46.886	133		Malawi	42.791	133		Poland	61.654	133		General Directorate of Digital Health and Information Systems for the SNS.Ministry of H..	51.791	133		Tajikistan	70.483
134		Ministry of Health Zambia	49	134		Ethiopia/Health Poverty Action	67.924	134		UNCHR Europe	41.521	134		Andorra	62.597	134		Taiwan	42.369	134		GABON	46.886	134		Ministry of Health Zambia	42	134		Government of Sierra Leone Ministry of Health and Sanitation	61.578	134		Sudan	51.54	134		El Salvador, MoH	70.327
135		Ministry of Health Zambia	49	135		Algeria	67.905	135		Syria	41.023	135		Zimbabwe	62.597	135		San Marino	42.099	135		Malawi	46.791	135		Serbia	41.905	135		Colombia	61.54	135		Vietnam	51.502	135		Center for Security and Emerging Technology	70.251
136		Tuvalu	48.848	136		Germany	67.867	136		Bahrain	41	136		Morocco	62.213	136		Iraq	41.616	136		Guyana	45.962	136		Solomon Islands	41.867	136		Angola	61.251	136		Liechtenstein	51.194	136		Timor-Leste	70.194
137		UNCHR Europe	48.521	137		Dominica	67.867	137		Liechtenstein	40.194	137		Venezuela	62.175	137		Argentina	41.156	137		Mozambique	45.635	137		Haiti	41.696	137		Benin	60.962	137		Ministry of Health Zambia	51	137		Antigua and Barbuda	69.943
138		Liechtenstein	48.194	138		Sri Lanka	67.597	138		Tuvalu	39.848	138		Directorate of Health, Iceland	61.962	138		Haiti	40.696	138		Nepal	45.616	138		Dominica	40.616	138		mauritania	60.829	138		CDC	50.521	138		Qatar	69.848
139		Haiti	47.696	139		Zimbabwe	67.597	139		Sudan	39.54	139		Honduras	61.905	139		COMOROS	40.426	139		Australia	45.578	139		Turkmenistan	40.369	139		Croatia	60.578	139		Ministry of Health Zambia	50	139		Equatorial Guinea	69.635
140		Dominica	47.616	140		Colombia	67.54	140		Argentina	39.156	140		Bhutan	61.886	140		Turkmenistan	40.369	140		CDC	45.521	140		Denmark	40.274	140		Bangladesh	60.327	140		Solomon Islands	49.867	140		Croatia	69.578
141		CDC	47.521	141		United States of America	67.308	141		COMOROS	38.426	141		Saint Kitts and Nevis	61.559	141		Cambodia	40.118	141		Côte d'ivoire	45.502	141		Cambodia	39.118	141		Center for Security and Emerging Technology	60.251	141		Haiti	49.696	141		Colombia	69.54
142		Cameroon	46.962	142		Bhutan	66.886	142		Ministry of Health and Wellness Jamaica	38.175	142		Somalia	61.232	142		Cameroon	39.962	142		CHAI , Zimbabwe	45.464	142		Azerbaijan	38.962	142		Ukraine - Slava Ukraini!!!	60.232	142		Cameroon	48.962	142		Ukraine - Slava Ukraini!!!	69.232
143		COMOROS	45.426	143		Qatar	66.848	143		Cameroon	37.962	143		Greece	61.175	143		General Directorate of Digital Health and Information Systems for the SNS.Ministry of H..	39.791	143		San Marino	45.099	143		Tuvalu	38.848	143		Morocco	60.213	143		Azerbaijan	48.962	143		Population Services International (PSI)	69.213
144		Azerbaijan	44.962	144		ICRC	66.829	144		Republic of North Macedonia	37.407	144		Armenia	60.981	144		UNCHR Europe	39.521	144		Seychelles Madagascar Comoros and Seychelles for UNAIDS	44.943	144		CDC	38.521	144		Austria	59.943	144		Tuvalu	48.848	144		Algeria	68.962
145		Sudan	44.54	145		mauritania	66.829	145		Kenya	36.369	145		Antigua and Barbuda	60.943	145		Bahrain	38	145		Solomon Islands	44.867	145		Sudan	37.54	145		Guiné-Bissau	59.54	145		Argentina	48.156	145		Population Services International	68.962
146		Ipas	44.388	146		Guiné-Bissau	66.54	146		China	35.981	146		Cuba	60.905	146		Saudi Arabia	37.924	146		Malawi	44.791	146		Kenya	37.369	146		SLOVENIA	59.54	146		Syria	48.023	146		Lao PDR	68.905
147		Turkmenistan	44.369	147		Tanzania	66.175	147		Saudi Arabia	34.924	147		Dominica	60.867	147		Tuvalu	37.848	147		Dominica	44.616	147		Argentina	37.156	147		United States of America	59.308	147		Bahrain	47	147		United States of America	68.308
148		Argentina	44.156	148		Austria	65.943	148		Denmark	34.274	148		Ecuador	60.867	148		Syria	37.023	148		Republic of Marshall Islands	44.232	148		Cameroon	36.962	148		Timor-Leste	59.194	148		COMOROS	46.426	148		Eswatini	68.251
149		Bahrain	44	149		Honduras	65.905	149		Sweden	34.137	149		Eritrea	60.867	149		China	36.981	149		Liechtenstein	44.194	149		Ipas	36.388	149		Population Services International	58.962	149		Turkmenistan	46.369	149		Angola	68.251
150	Weakly Approching GPOC	Republic of North Macedonia	43.407	150		Embassy of Sweden - UAE	65.848	150		Ghana	33.696	150		ICRC	60.829	150		Azerbaijan	36.962	150		Belize	44.042	150		Ministry of Health and Wellness Jamaica	36.175	150		Honduras	58.905	150		Brunei	45.616	150		Poland (good initiative - last week a record of refugees)	68.232
151		Kenya	43.369	151		Bangladesh	65.327	151		Guinea	33.061	151		Botswana, Botswana ministry of health	59.981	151		Brunei	35.616	151		Ministry of Health Zambia	44	151		Bahrain	36	151		Germany	58.867	151		Seychelles	44.962	151		Morocco	68.213
152		Denmark	43.274	152		Montenegro	64.924	152		Yemen	32	152		Embassy of Sweden - UAE	59.848	152		Sudan	35.54	152	GPOC Welcoming	Serbia	43.905	152		COMOROS	35.426	152		Andorra	58.597	152		Ministry of Health and Wellness Jamaica	44.175	152		Belize	68
153		Syria	43.023	153		Ecuador	64.867	153		Seychelles	31.962	153		mauritania	59.829	153		Republic of North Macedonia	35.407	153		Eswatini	43.791	153		China	34.981	153		Tajikistan	58.483	153		Sweden	44.137	153		Georgia	67.943
154		Brunei	42.616	154		Ministry of Health & Wellness, Jamaica	64.213	154		South Sudan	31.791	154		Switzerland	59.81	154		Kenya	34.369	154		Lithuania	43.635	154		Seychelles	34.962	154		Poland (good initiative - last week a record of refugees)	58.232	154	Weakly Approching GPOC	Republic of North Macedonia	43.407	154		Kazakhstan	67.867
155		Ministry of Health and Wellness Jamaica	42.175	155		Timor-Leste	64.194	155		Tunisia	30.559	155		SLOVENIA	59.54	155		Seychelles	33.962	155		Taiwan	43.369	155		Brunei	34.616	155		Botswana, Botswana ministry of health	57.981	155		Ipas	43.388	155		COSTA RICA	67.848
156		China	41.981	156		Eritrea	63.867	156		Equatorial Guinea	30	156		El Salvador, MoH	59.327	156		Ipas	33.388	156		Liechtenstein	43.194	156		Republic of North Macedonia	34.407	156		Bhutan	57.886	156		Denmark	43.274	156		Botswana, Botswana ministry of health	66.981
157		Saudi Arabia	41.924	157		Saint Kitts and Nevis	63.559	157		Cyprus	29.848	157		Ministry of Health & Wellness, Jamaica	59.213	157		Denmark	33.274	157		San Marino	43.099	157		Sweden	34.137	157		Eritrea	57.867	157		Saudi Arabia	42.924	157		Nepal	66.616
158		Seychelles	39.962	158		SLOVENIA	63.54	158		SIL International, Central African Republic	29.255	158		Egypt	58.886	158		Guinea	33.061	158		MOH Malaysia	43.061	158		Syria	32.023	158		Qatar	57.848	158		Kenya	42.369	158		Ministry of Health & Wellness, Jamaica	66.213
159		Sweden	38.137	159		Center for Security and Emerging Technology	63.251	159		Libya	28.544	159		Germany	58.867	159		Ghana	32.696	159		Guyana	42.962	159		Saudi Arabia	31.924	159		Embassy of Sweden - UAE	57.848	159		China	40.981	159		Honduras	65.905
160		South Sudan	36.791	160		Poland (good initiative - last week a record of refugees)	63.232	160		Niger	27.848	160		Tajikistan	58.483	160		Libya	32.544	160		Serbia	42.905	160		South Sudan	30.791	160		COSTA RICA	57.848	160		South Sudan	39.791	160		Eritrea	65.867
161		Libya	36.544	161		Greece	63.175	161		Ireland	25.27	161		Bangladesh	58.327	161		Ministry of Health and Wellness Jamaica	32.175	161		Republic of Congo	42.867	161		Tunisia	29.559	161		Ministry of Health & Wellness, Jamaica	57.213	161		Tunisia	38.559	161		Andorra	65.597
162		Guinea	36.061	162		Venezuela	63.175	162		Finland	25.061	162		Belize	58	162		Sweden	30.137	162		Iraq	42.616	162		Libya	29.544	162		Greece	57.175	162		Libya	38.544	162		SLOVENIA	65.54
163		Ghana	35.696	163		Directorate of Health, Iceland	62.962	163		Latvia	24.829	163		Population Services International	57.962	163		Niger	27.848	163		Iraq	42.616	163		Guinea	27.061	163		Kenya	55.848	163		Cyprus	37.848	163		Papua New Guinea	65.213
164		Tunisia	34.559	164		Population Services International	62.962	164		Thailand	21.327	164		Kenya	57.848	164		Tunisia	27.559	164		Taiwan	42.369	164		Finland	27.061	164		Nepal	55.616	164		Guinea	37.061	164		Greece	65.175
165		Niger	33.848	165		Egypt	62.886	165		Niger	33.848	165		Guiné-Bissau	57.54	165		South Sudan	26.791	165		Argentina	42.156	165		Cyprus	26.848	165		Venezuela	55.175	165		Niger	36.848	165		Venezuela	65.175
166		Finland	33.061	166		COSTA RICA	62.848	166		Finland	33.061	166		Mauritius	57.521	166		SIL International, Central African Republic	26.255	166		Cambodia	42.118	166		Ghana	25.696	166		Ecuador	54.867	166		Ghana	35.696	166		Samoa	65.137
167		Cyprus	31.848	167		Tajikistan	62.483	167		Cyprus	31.848	167		Center for Security and Emerging Technology	57.251	167		Cyprus	25.848	167		barbados	41.791	167		Ireland	23.27	167		Kazakhstan	54.867	167		Finland	35.061	167		Germany	64.867
168		Equatorial Guinea	31	168		Papua New Guinea	62.213	168		Equatorial Guinea	31	168		Papua New Guinea	57.213	168		Finland	25.061	168		Haiti	41.696	168		Equatorial Guinea	22	168		Italia	54.829	168		Thailand	34.327	168		Italia	64.829
170		SIL International, Central African Republic	30.255	169		Switzerland	61.81	170		SIL International, Central African Republic	30.255	169		Montenegro	56.924	170		Ireland	24.27	169		UNCHR Europe	41.521	170		Niger	20.848	169		Saint Kitts and Nevis	54.559	170		Equatorial Guinea	34	169		CHAI , Zimbabwe	64.464
171		Latvia	29.829	170		Tanzania	61.81	171		Latvia	29.829	170		COSTA RICA	56.848	171		Equatorial Guinea	24	170		COMOROS	41.426	171		SIL International, Central African Republic	20.255	170		International Federation of RedCross RedCrescent/Swedish Red Cross in DPR Korea (North ..	54.27	171		Ireland	33.27	170		Hungary	64.308
172		Ireland	29.27	171		Kenya	60.848	172		Ireland	29.27	171		Timor-Leste	56.194	172		Latvia	20.829	171		Turkmenistan	41.369	172		Thailand	19.327	171		Papua New Guinea	54.213	172		SIL International, Central African Republic	32.255	171	GPOC Welcoming	Bhutan	63.886
173		Thailand	27.327	172		CHAI , Zimbabwe	60.464	173		Thailand	27.327	172		Democratic Republic of Congo	55.521	173		Thailand	16.327	172		Cambodia	41.118	173		Latvia	18.829	172		Belize	54	173		Latvia	30.829	172		Ecuador	63.867
				173		Hungary	60.308					173		International Federation of RedCross RedCrescent/Swedish Red Cross in DPR Korea (North ..	55.27					173		Cameroon	40.962					173		Directorate of Health, Iceland	53.962					173		Saint Kitts and Nevis	63.559
				174		Belize	60					174		Poland (good initiative - last week a record of refugees)	55.232					174		Bangladesh	40.867					174		GABON	53.886					174		Italy	63.213
				175		Italia	59.829					175		GABON	54.886					175		General Directorate of Digital Health and Information Systems for the SNS.Ministry of H..	40.791					175		CHAI , Zimbabwe	53.464					175		GABON	62.886
				176		Kazakhstan	58.867					176		Kazakhstan	54.867					176		Mozambique	40.635					176		Italy	53.213					176		Kenya	62.848
				177		Nepal	58.616					177		Tanzania	54.81					177		UNCHR Europe	40.521					177		Switzerland	52.81					177		Tanzania	62.81
				178		Australia	58.578					178		Hungary	54.308					178		CDC	40.521					178		Hungary	52.308					178		barbados	62.791
				179		Democratic Republic of Congo	58.521					179		Italy	54.213					179		Oman	40.426					179		Samoa	52.137					179		International Federation of RedCross RedCrescent/Swedish Red Cross in DPR Korea (North ..	62.27
				180		Mauritius	58.521					180		Samoa	54.137					180		Belgium	40.08					180		Tanzania	51.81					180		Mozambique	61.635
				181		Nigeria	58.445					181		Nepal	53.616					181		Chile	39.81					181		Mozambique	51.635					181		Nigeria	61.445
				182		Italy	58.213					182		Italia	52.829					182		General Directorate of Digital Health and Information Systems for the SNS.Ministry of H..	39.791					182		Mauritius	51.521					182		San Marino	61.099
				183		barbados	57.791					183		Australia	52.578					183		Ipas	39.388					183		Egypt	50.886					183		Côte d'ivoire	60.502
				184		International Federation of RedCross RedCrescent/Swedish Red Cross in DPR Korea (North ..	57.27					184		Sharda University Uzbekistan	52.388					184		Belize	39.042					184		barbados	50.791					184		Republic of Marshall Islands	60.232
				185		Chile	56.81					185		barbados	51.791					185		Bahrain	39					185		Eswatini	50.791					185		Directorate of Health, Iceland	59.962
				186		Côte d'ivoire	56.502					186		Eswatini	51.791					186		Seychelles Madagascar Comoros and Seychelles for UNAIDS	38.943					186		Nigeria	50.445					186		Switzerland	59.81
				187		Republic of Marshall Islands	56.232					187		CHAI , Zimbabwe	51.464					187		Saudi Arabia	38.924					187		Republic of Marshall Islands	50.232					187		Mauritius	59.521
				188		GABON	55.886					188		Nigeria	51.445					188		Solomon Islands	38.867					188		Australia	49.578					188		Democratic Republic of Congo	59.521
				189		Republic of Congo	55.867					189		Taiwan	51.369					189		Tuvalu	38.848					189		Oman	49.426					189		Seychelles Madagascar Comoros and Seychelles for UNAIDS	58.943
				190		Malawi	55.791					190		Republic of Marshall Islands	51.232					190		Syria	38.023					190		San Marino	49.099					190		Chile	58.81
				191		Eswatini	55.791					191		Malawi	49.791					191		Bahrain	38					191		Lithuania	48.635					191		Ministry of Health Zambia	58
				192		Oman	55.426					192		Mozambique	49.635					192		China	37.981					192		Democratic Republic of Congo	48.521					192		Egypt	57.886
				193		Sharda University Uzbekistan	55.388					193		Côte d'ivoire	49.502					193		Azerbaijan	37.962					193		Côte d'ivoire	48.502					193		Australia	57.578
				194		Samoa	55.137					194		Vietnam	49.502					194		Tuvalu	37.848					194		Sharda University Uzbekistan	48.388					194		Luxembourg	57.483
				195		Belgium	54.08					195		Cambodia	49.118					195		Dominica	37.616					195		Taiwan	48.369					195		Malawi	56.791
				196		Belize	54.042					196		MOH Malaysia	49.061					196		Sociedad Chilena de Medicina del Trabajo	37.502					196		Belgium	48.08					196		Oman	56.426
				197		State of Palestine	53.753					197		Belize	49.042					197		Argentina	37.156					197		Seychelles Madagascar Comoros and Seychelles for UNAIDS	47.943					197		Sharda University Uzbekistan	56.388
				198		Lithuania	53.635					198		Guyana	48.962					198		Syria	37.023					198		Belize	47.042					198		Belize	56.042
				199		Mozambique	53.635					199		Lithuania	48.635					199		Brunei	36.616					199		Guyana	46.962					199		Iraq	55.616
				200		Sociedad Chilena de Medicina del Trabajo	53.502					200		Belgium	48.08					200		Sudan	36.54					200		Republic of Congo	46.867					200		Taiwan	55.369
				201		MOH Malaysia	53.061					201		Republic of Congo	47.867					201		COMOROS	36.426					201		Bangladesh	46.867					201		Guyana	54.962
				202		Seychelles Madagascar Comoros and Seychelles for UNAIDS	52.943					202		Chile	47.81					202		Republic of North Macedonia	36.407					202		Chile	46.81					202		Serbia	54.905
				203		Bangladesh	52.867					203		Oman	47.426					203		Cameroon	35.962					203		Malawi	46.791					203		Eswatini	54.791
				204		Vietnam	52.502					204		Liechtenstein	47.194					204		State of Palestine	35.753					204		Iraq	46.616					204		Sudan	54.54
				205		Taiwan	52.369					205		San Marino	47.099					205		Kenya	35.369					205		MOH Malaysia	46.061					205		COMOROS	54.426
				206		San Marino	52.099					206		Bangladesh	46.867					206		Ministry of Health Zambia	35					206		State of Palestine	45.753					206		Belgium	54.08
				207		Guyana	51.962					207		Iraq	46.616					207		Seychelles	34.962					207		Luxembourg	45.483					207		Bangladesh	53.867
				208		Luxembourg	51.483					208		Sociedad Chilena de Medicina del Trabajo	46.502					208		Brunei	34.616					208		Ministry of Health Zambia	45					208		State of Palestine	53.753
				209		Solomon Islands	50.867					209		Seychelles Madagascar Comoros and Seychelles for UNAIDS	45.943					209		Ipas	34.388					209		Serbia	44.905					209		Haiti	53.696
				210		General Directorate of Digital Health and Information Systems for the SNS.Ministry of H..	50.791					210		General Directorate of Digital Health and Information Systems for the SNS.Ministry of H..	45.791					210		Turkmenistan	34.369					210	GPOC Welcoming	Sociedad Chilena de Medicina del Trabajo	43.502					210		Republic of Congo	52.867
				211		Iraq	50.616					211		CDC	45.521					211		Denmark	34.274					211		Vietnam	43.502					211		Lithuania	52.635
				212		Cambodia	50.118					212		Serbia	44.905					212		Guinea	34.061					212		Solomon Islands	42.867					212		Sociedad Chilena de Medicina del Trabajo	52.502
				213		Serbia	49.905					213		Solomon Islands	44.867					213		Ghana	33.696					213		Haiti	42.696					213		MOH Malaysia	52.061
				214		Ministry of Health Zambia	49					214		State of Palestine	44.753					214		Libya	33.544					214		Bahrain	42					214		Bahrain	52
				215		Tuvalu	48.848					215	GPOC Welcoming	Cameroon	43.962					215		Luxembourg	33.483					215		General Directorate of Digital Health and Information Systems for the SNS.Ministry of H..	41.791					215		Dominica	51.616
				216		UNCHR Europe	48.521					216		Dominica	43.616					216		Ministry of Health and Wellness Jamaica	33.175					216		Sudan	41.54					216		Vietnam	51.502
				217		Liechtenstein	48.194					217		UNCHR Europe	43.521					217		Azerbaijan	32.962					217		Cameroon	40.962					217		Syria	51.023
				218		Haiti	47.696					218		Luxembourg	43.483					218		Sudan	32.54					218		Azerbaijan	40.962					218		Cameroon	50.962
				219		Dominica	47.616					219		Bahrain	43					219		Seychelles	31.962					219		Tuvalu	40.848					219		General Directorate of Digital Health and Information Systems for the SNS.Ministry of H..	50.791
				220		CDC	47.521					220		Ipas	42.388					220		South Sudan	31.791					220		Dominica	40.616					220		Kenya	50.369
				221		Cameroon	46.962					221		Tuvalu	41.848					221		Kenya	31.369					221		COMOROS	40.426					221		Cambodia	50.118
				222		COMOROS	45.426					222		COMOROS	41.426					222		Sweden	31.137					222		UNCHR Europe	39.521					222		Azerbaijan	49.962
				223		Azerbaijan	44.962					223		Ministry of Health Zambia	41					223		Guinea	31.061					223		CDC	39.521					223		Solomon Islands	49.867
				224		Sudan	44.54					224		Kenya	40.369					224		Haiti	30.696					224		Kenya	39.369					224		Tuvalu	48.848
				225		Ipas	44.388					225		Argentina	40.156					225		Denmark	30.274					225		Brunei	38.616					225		Brunei	48.616
				226		Turkmenistan	44.369					226		Azerbaijan	39.962					226		Libya	29.544					226		Liechtenstein	38.194					226		CDC	48.521
				227		Argentina	44.156					227		Brunei	39.616					227		Republic of North Macedonia	29.407					227		Cambodia	38.118					227		Argentina	48.156
				228		Bahrain	44					228		Syria	39.023					228		SIL International, Central African Republic	29.255					228		Syria	38.023					228		Ipas	47.388
				229	GPOC Welcoming	Republic of North Macedonia	43.407					229		Haiti	38.696					229		China	28.981					229		Argentina	37.156					229		Denmark	46.274
				230		Kenya	43.369					230		Turkmenistan	38.369					230		Saudi Arabia	28.924					230		Denmark	36.274					230		Saudi Arabia	45.924
				231		Denmark	43.274					231		Denmark	37.274					231		Niger	28.848					231		Seychelles	35.962					231		UNCHR Europe	45.521
				232		Syria	43.023					232		Seychelles	36.962					232		Latvia	28.829					232		Republic of North Macedonia	35.407					232		Liechtenstein	45.194
				233		Brunei	42.616					233		Sudan	36.54					233		Tunisia	28.559					233		Ipas	35.388					233		South Sudan	44.791
				234		Ministry of Health and Wellness Jamaica	42.175					234		Republic of North Macedonia	36.407					234		Ireland	28.27					234		Ministry of Health and Wellness Jamaica	35.175					234		Guinea	44.061
				235		China	41.981					235		Ministry of Health and Wellness Jamaica	36.175					235		South Sudan	27.791					235		Saudi Arabia	34.924					235		Seychelles	43.962
				236		Saudi Arabia	41.924					236		Saudi Arabia	35.924					236		SIL International, Central African Republic	27.255					236		South Sudan	34.791					236		Libya	42.544
				237		Seychelles	39.962					237		South Sudan	35.791					237		Sweden	27.137					237		Turkmenistan	34.369					237		Republic of North Macedonia	42.407
				238		Sweden	38.137					238		Sweden	33.137					238		Cyprus	26.848					238		Sweden	32.137					238		Finland	42.061
				239		South Sudan	36.791					239		Guinea	33.061					239		Cyprus	26.848					239		Guinea	32.061					239		Equatorial Guinea	42
				240		Libya	36.544					240		Finland	33.061					240		Tunisia	26.559					240		Finland	32.061					240		China	40.981
				241		Guinea	36.061					241		China	32.981					241		Thailand	26.327					241		China	31.981					241		Turkmenistan	40.369
				242		Ghana	35.696					242		Cyprus	31.848					242		Ministry of Health and Wellness Jamaica	26.175					242		Cyprus	30.848					242		SIL International, Central African Republic	39.255
				243		Tunisia	34.559					243		Ghana	31.696					243		Finland	26.061					243		Ghana	30.696					243		Ministry of Health and Wellness Jamaica	39.175
				244		Niger	33.848					244		Equatorial Guinea	31					244		Finland	26.061					244		Equatorial Guinea	30					244		Sweden	39.137
				245		Finland	33.061					245		Libya	30.544					245		Ireland	25.27					245		Libya	29.544					245		Ghana	38.696
				246		Cyprus	31.848					246		SIL International, Central African Republic	30.255					246		Equatorial Guinea	25					246		SIL International, Central African Republic	29.255					246		Latvia	37.829
				247		Equatorial Guinea	31					247		Latvia	29.829					247		Niger	24.848					247		Latvia	28.829					247		Thailand	37.327
				248		SIL International, Central African Republic	30.255					248		Ireland	29.27					248		Ghana	23.696					248		Ireland	28.27					248		Cyprus	36.848
				249		Latvia	29.829					249		Tunisia	27.559					249		Equatorial Guinea	22					249		Tunisia	26.559					249		Ireland	36.27
				250		Ireland	29.27					250		Thailand	27.327					250		Latvia	21.829					250		Thailand	26.327					250		Niger	34.848
				251		Thailand	27.327					251		Niger	25.848					251		Thailand	17.327					251		Niger	24.848					251		Tunisia	33.559
		Table 4 : Detailing of both the fiscal and non-fiscal representation together with world bank indicators.

## Sheet: Table 5
---------------------GPOC READY---	-----------	--------
[[0.37737036 0.20354067 0.26899808	0.033915	0.0814099	0.03476594]
[0.39914484 0.2123116 0.26237696	0.0293464	0.0594536	0.03736665]
[0.40397608 0.21815457 0.26675586	0.0221112	0.051838	0.0371643 ]
[0.28510894 0.17455297 0.37380541	0.129545	0.014876	0.02211119]
[0.32601523 0.19642026 0.29255085	0.00743802	0.151657	0.02591899]
[0.28510894 0.17455297 0.37380541	0.129545	0.014876	0.02211119]]
[[1]
[0]
[0]
[0]
[0]
[0]]
--------Matrix GPOC Ready-------
0
#NAME?	Ready-----	--
[[0.37737036]
[0.39914484]
[0.40397608]
[0.28510894]
[0.32601523]
[0.28510894]]
--------Matrix GPOC Ready-------
1
#NAME?	Ready-----	--
[[0.37844182]
[0.37976578]
[0.38108681]
[0.3763605 ]
[0.37856492]
[0.3763605 ]]
--------Matrix GPOC Ready-------
2
#NAME?	Ready-----	--
[[0.37928987]
[0.37928536]
[0.37931922]
[0.37934782]
[0.37942491]
[0.37934782]]
--------Matrix GPOC Ready-------
3
#NAME?	Ready-----	--
[[0.37931182]
[0.37930851]
[0.37930715]
[0.37931085]
[0.37931998]
[0.37931085]]
--------Matrix GPOC Ready-------
4
#NAME?	Ready-----	--
[[0.37931049]
[0.37931031]
[0.37931022]
[0.37930947]
[0.37931101]
[0.37930947]]
--------Matrix GPOC Ready-------
5
#NAME?	Ready-----	--
[[0.37931035]
[0.37931034]
[0.37931035]
[0.37931021]
[0.37931042]
[0.37931021]]
--------Matrix GPOC Ready-------
6
#NAME?	Ready-----	--
[[0.37931035]
[0.37931034]
[0.37931035]
[0.37931033]
[0.37931036]
[0.37931033]]
--------Matrix GPOC Ready-------
7
#NAME?	Ready-----	--
[[0.37931034]
[0.37931034]
[0.37931034]
[0.37931034]
[0.37931035]
[0.37931034]]
--------Matrix GPOC Ready-------
8
#NAME?	Ready-----	--
[[0.37931034]
[0.37931034]
[0.37931034]
[0.37931034]
[0.37931035]
[0.37931034]]
--------Matrix GPOC Ready-------
9
#NAME?	Ready-----	--
[[0.37931034]
[0.37931034]
[0.37931034]
[0.37931034]
[0.37931034]
[0.37931034]]
--------Matrix GPOC Ready-------
10
#NAME?	Ready-----	--
[[0.37931034]
[0.37931034]
[0.37931034]
[0.37931034]
[0.37931034]
[0.37931034]]
--------Matrix GPOC Ready-------
11
#NAME?	Ready-----	--
[[0.37931034]
[0.37931034]
[0.37931034]
[0.37931034]
[0.37931034]
[0.37931034]]
--------Matrix GPOC Ready-------
12
#NAME?	Ready-----	--
[[0.37931034]
[0.37931034]
[0.37931034]
[0.37931034]
[0.37931034]
[0.37931034]]
--------Matrix GPOC Ready-------
13
#NAME?	Ready-----	--
[[0.37931034]
[0.37931034]
[0.37931034]
[0.37931034]
[0.37931034]
[0.37931034]]
--------Matrix GPOC Ready-------
14
#NAME?	Ready-----	--
[[0.37931034]
[0.37931034]
[0.37931034]
[0.37931034]
[0.37931034]
[0.37931034]]
--------Matrix GPOC Ready-------
15
#NAME?	Ready-----	--
[[0.37931034]
[0.37931034]
[0.37931034]
[0.37931034]
[0.37931034]
[0.37931034]]
--------Matrix GPOC Ready-------
16
#NAME?	Ready-----	--
[[0.37931034]
[0.37931034]
[0.37931034]
[0.37931034]
[0.37931034]
[0.37931034]]
--------Matrix GPOC Ready-------
17
#NAME?	Ready-----	--
[[0.37931034]
[0.37931034]
[0.37931034]
[0.37931034]
[0.37931034]
[0.37931034]]
--------Matrix GPOC Ready-------
18
#NAME?	Ready-----	--
[[0.37931034]
[0.37931034]
[0.37931034]
[0.37931034]
[0.37931034]
[0.37931034]]
--------Matrix GPOC Ready-------
19
#NAME?	Ready-----	--
[[0.37931034]
[0.37931034]
[0.37931034]
[0.37931034]
[0.37931034]
[0.37931034]]
--------Matrix GPOC Ready-------
20
#NAME?	Ready-----	--
[[0.37931034]
[0.37931034]
[0.37931034]
[0.37931034]
[0.37931034]
[0.37931034]]
--------Matrix GPOC Ready-------
21
#NAME?	Ready-----	--
[[0.37931034]
[0.37931034]
[0.37931034]
[0.37931034]
[0.37931034]
[0.37931034]]
--------Matrix GPOC Ready-------
22
#NAME?	Ready-----	--
[[0.37931034]
[0.37931034]
[0.37931034]
[0.37931034]
[0.37931034]
[0.37931034]]
--------Matrix GPOC Ready-------
23
#NAME?	Ready-----	--
[[0.37931034]
[0.37931034]
[0.37931034]
[0.37931034]
[0.37931034]
[0.37931034]]
--------Matrix GPOC Ready-------
24
#NAME?	Ready-----	--
[[0.37931034]
[0.37931034]
[0.37931034]
[0.37931034]
[0.37931034]
[0.37931034]]
--------Matrix GPOC Ready-------
25
#NAME?	Ready-----	--
[[0.37931034]
[0.37931034]
[0.37931034]
[0.37931034]
[0.37931034]
[0.37931034]]
--------Matrix GPOC Ready-------
26
#NAME?	Ready-----	--
[[0.37931034]
[0.37931034]
[0.37931034]
[0.37931034]
[0.37931034]
[0.37931034]]
--------Matrix GPOC Ready-------
27
#NAME?	Ready-----	--
[[0.37931034]
[0.37931034]
[0.37931034]
[0.37931034]
[0.37931034]
[0.37931034]]
--------Matrix GPOC Ready-------
28
#NAME?	Ready-----	--
[[0.37931034]
[0.37931034]
[0.37931034]
[0.37931034]
[0.37931034]
[0.37931034]]
--------Matrix GPOC Ready-------
29
#NAME?	Ready-----	--
[[0.37931034]
[0.37931034]
[0.37931034]
[0.37931034]
[0.37931034]
[0.37931034]]
--------Matrix GPOC Ready-------
30
#NAME?	Ready-----	--
[[0.37931034]
[0.37931034]
[0.37931034]
[0.37931034]
[0.37931034]
[0.37931034]]
--------Matrix GPOC Ready-------
31
#NAME?	Ready-----	--
[[0.37931034]
[0.37931034]
[0.37931034]
[0.37931034]
[0.37931034]
[0.37931034]]
--------Matrix GPOC Ready-------
32
#NAME?	Ready-----	--
[[0.37931034]
[0.37931034]
[0.37931034]
[0.37931034]
[0.37931034]
[0.37931034]]
--------Matrix GPOC Ready-------
33
#NAME?	Ready-----	--
[[0.37931034]
[0.37931034]
[0.37931034]
[0.37931034]
[0.37931034]
[0.37931034]]
--------Matrix GPOC Ready-------
34
#NAME?	Ready-----	--
[[0.37931034]
[0.37931034]
[0.37931034]
[0.37931034]
[0.37931034]
[0.37931034]]
--------Matrix GPOC Ready-------
35
#NAME?	Ready-----	--
[[0.37931034]
[0.37931034]
[0.37931034]
[0.37931034]
[0.37931034]
[0.37931034]]
--------Matrix GPOC Ready-------
36
#NAME?	Ready-----	--
[[0.37931034]
[0.37931034]
[0.37931034]
[0.37931034]
[0.37931034]
[0.37931034]]
--------Matrix GPOC Ready-------
37
#NAME?	Ready-----	--
[[0.37931034]
[0.37931034]
[0.37931034]
[0.37931034]
[0.37931034]
[0.37931034]]
--------Matrix GPOC Ready-------
38
#NAME?	Ready-----	--
[[0.37931034]
[0.37931034]
[0.37931034]
[0.37931034]
[0.37931034]
[0.37931034]]
--------Matrix GPOC Ready-------
39
#NAME?	Ready-----	--
[[0.37931034]
[0.37931034]
[0.37931034]
[0.37931034]
[0.37931034]
[0.37931034]]
--------Matrix GPOC Ready-------
40
#NAME?	Ready-----	--
[[0.37931034]
[0.37931034]
[0.37931034]
[0.37931034]
[0.37931034]
[0.37931034]]
--------Matrix GPOC Ready-------
41
#NAME?	Ready-----	--
[[0.37931034]
[0.37931034]
[0.37931034]
[0.37931034]
[0.37931034]
[0.37931034]]
--------Matrix GPOC Ready-------
42
#NAME?	Ready-----	--
[[0.37931034]
[0.37931034]
[0.37931034]
[0.37931034]
[0.37931034]
[0.37931034]]
--------Matrix GPOC Ready-------
43
#NAME?	Ready-----	--
[[0.37931034]
[0.37931034]
[0.37931034]
[0.37931034]
[0.37931034]
[0.37931034]]
--------Matrix GPOC Ready-------
44
#NAME?	Ready-----	--
[[0.37931034]
[0.37931034]
[0.37931034]
[0.37931034]
[0.37931034]
[0.37931034]]
--------Matrix GPOC Ready-------
45
#NAME?	Ready-----	--
[[0.37931034]
[0.37931034]
[0.37931034]
[0.37931034]
[0.37931034]
[0.37931034]]
--------Matrix GPOC Ready-------
46
#NAME?	Ready-----	--
[[0.37931034]
[0.37931034]
[0.37931034]
[0.37931034]
[0.37931034]
[0.37931034]]
--------Matrix GPOC Ready-------
47
#NAME?	Ready-----	--
[[0.37931034]
[0.37931034]
[0.37931034]
[0.37931034]
[0.37931034]
[0.37931034]]
--------Matrix GPOC Ready-------
48
#NAME?	Ready-----	--
[[0.37931034]
[0.37931034]
[0.37931034]
[0.37931034]
[0.37931034]
[0.37931034]]
--------Matrix GPOC Ready-------
49
#NAME?	Ready-----	--
[[0.37931034]
[0.37931034]
[0.37931034]
[0.37931034]
[0.37931034]
[0.37931034]]
GPOC READINESS TRANSITION MODEL CO	NVERGED SUC	CESSFULLY
#NAME?	G----------	-----------	-
[[0.37737036 0.20354067 0.26899808	0.033915	0.0814099	0.03476594]
[0.39914484 0.2123116 0.26237696	0.0293464	0.0594536	0.03736665]
[0.40397608 0.21815457 0.26675586	0.0221112	0.051838	0.0371643 ]
[0.28510894 0.17455297 0.37380541	0.129545	0.014876	0.02211119]
[0.32601523 0.19642026 0.29255085	0.00743802	0.151657	0.02591899]
[0.28510894 0.17455297 0.37380541	0.129545	0.014876	0.02211119]]
[[0]
[0]
[0]
[0]
[0]
[1]]
-------GPOC Welcoming Matrix------	-
0
#NAME?	ming-------
[[0.03476594]
[0.03736665]
[0.0371643 ]
[0.02211119]
[0.02591899]
[0.02211119]]
-------GPOC Welcoming Matrix------	-
1
#NAME?	ming-------
[[0.03435107]
[0.03457716]
[0.03476435]
[0.03406564]
[0.03421459]
[0.03406564]]
-------GPOC Welcoming Matrix------	-
2
#NAME?	ming-------
[[0.03447755]
[0.03448035]
[0.03448664]
[0.0344997 ]
[0.03448617]
[0.0344997 ]]
-------GPOC Welcoming Matrix------	-
3
#NAME?	ming-------
[[0.03448279]
[0.03448252]
[0.03448235]
[0.03448492]
[0.0344828 ]
[0.03448492]]
-------GPOC Welcoming Matrix------	-
4
#NAME?	ming-------
[[0.03448276]
[0.03448276]
[0.03448274]
[0.0344829 ]
[0.03448268]
[0.0344829 ]]
-------GPOC Welcoming Matrix------	-
5
#NAME?	ming-------
[[0.03448276]
[0.03448276]
[0.03448276]
[0.03448277]
[0.03448275]
[0.03448277]]
-------GPOC Welcoming Matrix------	-
6
#NAME?	ming-------
[[0.03448276]
[0.03448276]
[0.03448276]
[0.03448276]
[0.03448276]
[0.03448276]]
-------GPOC Welcoming Matrix------	-
7
#NAME?	ming-------
[[0.03448276]
[0.03448276]
[0.03448276]
[0.03448276]
[0.03448276]
[0.03448276]]
-------GPOC Welcoming Matrix------	-
8
#NAME?	ming-------
[[0.03448276]
[0.03448276]
[0.03448276]
[0.03448276]
[0.03448276]
[0.03448276]]
-------GPOC Welcoming Matrix------	-
9
#NAME?	ming-------
[[0.03448276]
[0.03448276]
[0.03448276]
[0.03448276]
[0.03448276]
[0.03448276]]
-------GPOC Welcoming Matrix------	-
10
#NAME?	ming-------
[[0.03448276]
[0.03448276]
[0.03448276]
[0.03448276]
[0.03448276]
[0.03448276]]
-------GPOC Welcoming Matrix------	-
11
#NAME?	ming-------
[[0.03448276]
[0.03448276]
[0.03448276]
[0.03448276]
[0.03448276]
[0.03448276]]
-------GPOC Welcoming Matrix------	-
12
#NAME?	ming-------
[[0.03448276]
[0.03448276]
[0.03448276]
[0.03448276]
[0.03448276]
[0.03448276]]
-------GPOC Welcoming Matrix------	-
13
#NAME?	ming-------
[[0.03448276]
[0.03448276]
[0.03448276]
[0.03448276]
[0.03448276]
[0.03448276]]
-------GPOC Welcoming Matrix------	-
14
#NAME?	ming-------
[[0.03448276]
[0.03448276]
[0.03448276]
[0.03448276]
[0.03448276]
[0.03448276]]
-------GPOC Welcoming Matrix------	-
15
#NAME?	ming-------
[[0.03448276]
[0.03448276]
[0.03448276]
[0.03448276]
[0.03448276]
[0.03448276]]
-------GPOC Welcoming Matrix------	-
16
#NAME?	ming-------
[[0.03448276]
[0.03448276]
[0.03448276]
[0.03448276]
[0.03448276]
[0.03448276]]
-------GPOC Welcoming Matrix------	-
17
#NAME?	ming-------
[[0.03448276]
[0.03448276]
[0.03448276]
[0.03448276]
[0.03448276]
[0.03448276]]
-------GPOC Welcoming Matrix------	-
18
#NAME?	ming-------
[[0.03448276]
[0.03448276]
[0.03448276]
[0.03448276]
[0.03448276]
[0.03448276]]
-------GPOC Welcoming Matrix------	-
19
#NAME?	ming-------
[[0.03448276]
[0.03448276]
[0.03448276]
[0.03448276]
[0.03448276]
[0.03448276]]
-------GPOC Welcoming Matrix------	-
20
#NAME?	ming-------
[[0.03448276]
[0.03448276]
[0.03448276]
[0.03448276]
[0.03448276]
[0.03448276]]
-------GPOC Welcoming Matrix------	-
21
#NAME?	ming-------
[[0.03448276]
[0.03448276]
[0.03448276]
[0.03448276]
[0.03448276]
[0.03448276]]
-------GPOC Welcoming Matrix------	-
22
#NAME?	ming-------
[[0.03448276]
[0.03448276]
[0.03448276]
[0.03448276]
[0.03448276]
[0.03448276]]
-------GPOC Welcoming Matrix------	-
23
#NAME?	ming-------
[[0.03448276]
[0.03448276]
[0.03448276]
[0.03448276]
[0.03448276]
[0.03448276]]
-------GPOC Welcoming Matrix------	-
24
#NAME?	ming-------
[[0.03448276]
[0.03448276]
[0.03448276]
[0.03448276]
[0.03448276]
[0.03448276]]
-------GPOC Welcoming Matrix------	-
25
#NAME?	ming-------
[[0.03448276]
[0.03448276]
[0.03448276]
[0.03448276]
[0.03448276]
[0.03448276]]
-------GPOC Welcoming Matrix------	-
26
#NAME?	ming-------
[[0.03448276]
[0.03448276]
[0.03448276]
[0.03448276]
[0.03448276]
[0.03448276]]
-------GPOC Welcoming Matrix------	-
27
#NAME?	ming-------
[[0.03448276]
[0.03448276]
[0.03448276]
[0.03448276]
[0.03448276]
[0.03448276]]
-------GPOC Welcoming Matrix------	-
28
#NAME?	ming-------
[[0.03448276]
[0.03448276]
[0.03448276]
[0.03448276]
[0.03448276]
[0.03448276]]
-------GPOC Welcoming Matrix------	-
29
#NAME?	ming-------
[[0.03448276]
[0.03448276]
[0.03448276]
[0.03448276]
[0.03448276]
[0.03448276]]
-------GPOC Welcoming Matrix------	-
30
#NAME?	ming-------
[[0.03448276]
[0.03448276]
[0.03448276]
[0.03448276]
[0.03448276]
[0.03448276]]
-------GPOC Welcoming Matrix------	-
31
#NAME?	ming-------
[[0.03448276]
[0.03448276]
[0.03448276]
[0.03448276]
[0.03448276]
[0.03448276]]
-------GPOC Welcoming Matrix------	-
32
#NAME?	ming-------
[[0.03448276]
[0.03448276]
[0.03448276]
[0.03448276]
[0.03448276]
[0.03448276]]
-------GPOC Welcoming Matrix------	-
33
#NAME?	ming-------
[[0.03448276]
[0.03448276]
[0.03448276]
[0.03448276]
[0.03448276]
[0.03448276]]
-------GPOC Welcoming Matrix------	-
34
#NAME?	ming-------
[[0.03448276]
[0.03448276]
[0.03448276]
[0.03448276]
[0.03448276]
[0.03448276]]
-------GPOC Welcoming Matrix------	-
35
#NAME?	ming-------
[[0.03448276]
[0.03448276]
[0.03448276]
[0.03448276]
[0.03448276]
[0.03448276]]
-------GPOC Welcoming Matrix------	-
36
#NAME?	ming-------
[[0.03448276]
[0.03448276]
[0.03448276]
[0.03448276]
[0.03448276]
[0.03448276]]
-------GPOC Welcoming Matrix------	-
37
#NAME?	ming-------
[[0.03448276]
[0.03448276]
[0.03448276]
[0.03448276]
[0.03448276]
[0.03448276]]
-------GPOC Welcoming Matrix------	-
38
#NAME?	ming-------
[[0.03448276]
[0.03448276]
[0.03448276]
[0.03448276]
[0.03448276]
[0.03448276]]
-------GPOC Welcoming Matrix------	-
39
#NAME?	ming-------
[[0.03448276]
[0.03448276]
[0.03448276]
[0.03448276]
[0.03448276]
[0.03448276]]
-------GPOC Welcoming Matrix------	-
40
#NAME?	ming-------
[[0.03448276]
[0.03448276]
[0.03448276]
[0.03448276]
[0.03448276]
[0.03448276]]
-------GPOC Welcoming Matrix------	-
41
#NAME?	ming-------
[[0.03448276]
[0.03448276]
[0.03448276]
[0.03448276]
[0.03448276]
[0.03448276]]
-------GPOC Welcoming Matrix------	-
42
#NAME?	ming-------
[[0.03448276]
[0.03448276]
[0.03448276]
[0.03448276]
[0.03448276]
[0.03448276]]
-------GPOC Welcoming Matrix------	-
43
#NAME?	ming-------
[[0.03448276]
[0.03448276]
[0.03448276]
[0.03448276]
[0.03448276]
[0.03448276]]
-------GPOC Welcoming Matrix------	-
44
#NAME?	ming-------
[[0.03448276]
[0.03448276]
[0.03448276]
[0.03448276]
[0.03448276]
[0.03448276]]
-------GPOC Welcoming Matrix------	-
45
#NAME?	ming-------
[[0.03448276]
[0.03448276]
[0.03448276]
[0.03448276]
[0.03448276]
[0.03448276]]
-------GPOC Welcoming Matrix------	-
46
#NAME?	ming-------
[[0.03448276]
[0.03448276]
[0.03448276]
[0.03448276]
[0.03448276]
[0.03448276]]
-------GPOC Welcoming Matrix------	-
47
#NAME?	ming-------
[[0.03448276]
[0.03448276]
[0.03448276]
[0.03448276]
[0.03448276]
[0.03448276]]
-------GPOC Welcoming Matrix------	-
48
#NAME?	ming-------
[[0.03448276]
[0.03448276]
[0.03448276]
[0.03448276]
[0.03448276]
[0.03448276]]
-------GPOC Welcoming Matrix------	-
49
#NAME?	ming-------
[[0.03448276]
[0.03448276]
[0.03448276]
[0.03448276]
[0.03448276]
[0.03448276]]
GPOC WELCOMING TRANSITION MODEL CO	NVERGED SUC	CESSFULLY
#NAME?	APPROACHIN	G----------	------------
[[0.37737036 0.20354067 0.26899808	0.033915	0.0814099	0.03476594]
[0.39914484 0.2123116 0.26237696	0.0293464	0.0594536	0.03736665]
[0.40397608 0.21815457 0.26675586	0.0221112	0.051838	0.0371643 ]
[0.28510894 0.17455297 0.37380541	0.129545	0.014876	0.02211119]
[0.32601523 0.19642026 0.29255085	0.00743802	0.151657	0.02591899]
[0.28510894 0.17455297 0.37380541	0.129545	0.014876	0.02211119]]
[[0]
[1]
[0]
[0]
[0]
[0]]
#NAME?	aching-----	--
0
#NAME?	ngly Approa	ching------	--
[[0.20354067]
[0.2123116 ]
[0.21815457]
[0.17455297]
[0.19642026]
[0.17455297]]
#NAME?	aching-----	--
1
#NAME?	ngly Approa	ching------	--
[[0.20668645]
[0.20688 ]
[0.20726506]
[0.20603232]
[0.20749197]
[0.20603232]]
#NAME?	aching-----	--
2
#NAME?	ngly Approa	ching------	--
[[0.20690214]
[0.20688361]
[0.206886 ]
[0.2068493 ]
[0.20699408]
[0.2068493 ]]
#NAME?	aching-----	--
3
#NAME?	ngly Approa	ching------	--
[[0.20689788]
[0.20689591]
[0.20689543]
[0.20688623]
[0.20690596]
[0.20688623]]
#NAME?	aching-----	--
4
#NAME?	ngly Approa	ching------	--
[[0.20689668]
[0.20689652]
[0.20689653]
[0.20689497]
[0.20689761]
[0.20689497]]
#NAME?	aching-----	--
5
#NAME?	ngly Approa	ching------	--
[[0.20689657]
[0.20689655]
[0.20689655]
[0.20689635]
[0.20689669]
[0.20689635]]
#NAME?	aching-----	--
6
#NAME?	ngly Approa	ching------	--
[[0.20689655]
[0.20689655]
[0.20689655]
[0.20689653]
[0.20689657]
[0.20689653]]
#NAME?	aching-----	--
7
#NAME?	ngly Approa	ching------	--
[[0.20689655]
[0.20689655]
[0.20689655]
[0.20689655]
[0.20689655]
[0.20689655]]
#NAME?	aching-----	--
8
#NAME?	ngly Approa	ching------	--
[[0.20689655]
[0.20689655]
[0.20689655]
[0.20689655]
[0.20689655]
[0.20689655]]
#NAME?	aching-----	--
9
#NAME?	ngly Approa	ching------	--
[[0.20689655]
[0.20689655]
[0.20689655]
[0.20689655]
[0.20689655]
[0.20689655]]
#NAME?	aching-----	--
10
#NAME?	ngly Approa	ching------	--
[[0.20689655]
[0.20689655]
[0.20689655]
[0.20689655]
[0.20689655]
[0.20689655]]
#NAME?	aching-----	--
11
#NAME?	ngly Approa	ching------	--
[[0.20689655]
[0.20689655]
[0.20689655]
[0.20689655]
[0.20689655]
[0.20689655]]
#NAME?	aching-----	--
12
#NAME?	ngly Approa	ching------	--
[[0.20689655]
[0.20689655]
[0.20689655]
[0.20689655]
[0.20689655]
[0.20689655]]
#NAME?	aching-----	--
13
#NAME?	ngly Approa	ching------	--
[[0.20689655]
[0.20689655]
[0.20689655]
[0.20689655]
[0.20689655]
[0.20689655]]
#NAME?	aching-----	--
14
#NAME?	ngly Approa	ching------	--
[[0.20689655]
[0.20689655]
[0.20689655]
[0.20689655]
[0.20689655]
[0.20689655]]
#NAME?	aching-----	--
15
#NAME?	ngly Approa	ching------	--
[[0.20689655]
[0.20689655]
[0.20689655]
[0.20689655]
[0.20689655]
[0.20689655]]
#NAME?	aching-----	--
16
#NAME?	ngly Approa	ching------	--
[[0.20689655]
[0.20689655]
[0.20689655]
[0.20689655]
[0.20689655]
[0.20689655]]
#NAME?	aching-----	--
17
#NAME?	ngly Approa	ching------	--
[[0.20689655]
[0.20689655]
[0.20689655]
[0.20689655]
[0.20689655]
[0.20689655]]
#NAME?	aching-----	--
18
#NAME?	ngly Approa	ching------	--
[[0.20689655]
[0.20689655]
[0.20689655]
[0.20689655]
[0.20689655]
[0.20689655]]
#NAME?	aching-----	--
19
#NAME?	ngly Approa	ching------	--
[[0.20689655]
[0.20689655]
[0.20689655]
[0.20689655]
[0.20689655]
[0.20689655]]
#NAME?	aching-----	--
20
#NAME?	ngly Approa	ching------	--
[[0.20689655]
[0.20689655]
[0.20689655]
[0.20689655]
[0.20689655]
[0.20689655]]
#NAME?	aching-----	--
21
#NAME?	ngly Approa	ching------	--
[[0.20689655]
[0.20689655]
[0.20689655]
[0.20689655]
[0.20689655]
[0.20689655]]
#NAME?	aching-----	--
22
#NAME?	ngly Approa	ching------	--
[[0.20689655]
[0.20689655]
[0.20689655]
[0.20689655]
[0.20689655]
[0.20689655]]
#NAME?	aching-----	--
23
#NAME?	ngly Approa	ching------	--
[[0.20689655]
[0.20689655]
[0.20689655]
[0.20689655]
[0.20689655]
[0.20689655]]
#NAME?	aching-----	--
24
#NAME?	ngly Approa	ching------	--
[[0.20689655]
[0.20689655]
[0.20689655]
[0.20689655]
[0.20689655]
[0.20689655]]
#NAME?	aching-----	--
25
#NAME?	ngly Approa	ching------	--
[[0.20689655]
[0.20689655]
[0.20689655]
[0.20689655]
[0.20689655]
[0.20689655]]
#NAME?	aching-----	--
26
#NAME?	ngly Approa	ching------	--
[[0.20689655]
[0.20689655]
[0.20689655]
[0.20689655]
[0.20689655]
[0.20689655]]
#NAME?	aching-----	--
27
#NAME?	ngly Approa	ching------	--
[[0.20689655]
[0.20689655]
[0.20689655]
[0.20689655]
[0.20689655]
[0.20689655]]
#NAME?	aching-----	--
28
#NAME?	ngly Approa	ching------	--
[[0.20689655]
[0.20689655]
[0.20689655]
[0.20689655]
[0.20689655]
[0.20689655]]
#NAME?	aching-----	--
29
#NAME?	ngly Approa	ching------	--
[[0.20689655]
[0.20689655]
[0.20689655]
[0.20689655]
[0.20689655]
[0.20689655]]
#NAME?	aching-----	--
30
#NAME?	ngly Approa	ching------	--
[[0.20689655]
[0.20689655]
[0.20689655]
[0.20689655]
[0.20689655]
[0.20689655]]
#NAME?	aching-----	--
31
#NAME?	ngly Approa	ching------	--
[[0.20689655]
[0.20689655]
[0.20689655]
[0.20689655]
[0.20689655]
[0.20689655]]
#NAME?	aching-----	--
32
#NAME?	ngly Approa	ching------	--
[[0.20689655]
[0.20689655]
[0.20689655]
[0.20689655]
[0.20689655]
[0.20689655]]
#NAME?	aching-----	--
33
#NAME?	ngly Approa	ching------	--
[[0.20689655]
[0.20689655]
[0.20689655]
[0.20689655]
[0.20689655]
[0.20689655]]
#NAME?	aching-----	--
34
#NAME?	ngly Approa	ching------	--
[[0.20689655]
[0.20689655]
[0.20689655]
[0.20689655]
[0.20689655]
[0.20689655]]
#NAME?	aching-----	--
35
#NAME?	ngly Approa	ching------	--
[[0.20689655]
[0.20689655]
[0.20689655]
[0.20689655]
[0.20689655]
[0.20689655]]
#NAME?	aching-----	--
36
#NAME?	ngly Approa	ching------	--
[[0.20689655]
[0.20689655]
[0.20689655]
[0.20689655]
[0.20689655]
[0.20689655]]
#NAME?	aching-----	--
37
#NAME?	ngly Approa	ching------	--
[[0.20689655]
[0.20689655]
[0.20689655]
[0.20689655]
[0.20689655]
[0.20689655]]
#NAME?	aching-----	--
38
#NAME?	ngly Approa	ching------	--
[[0.20689655]
[0.20689655]
[0.20689655]
[0.20689655]
[0.20689655]
[0.20689655]]
#NAME?	aching-----	--
39
#NAME?	ngly Approa	ching------	--
[[0.20689655]
[0.20689655]
[0.20689655]
[0.20689655]
[0.20689655]
[0.20689655]]
#NAME?	aching-----	--
40
#NAME?	ngly Approa	ching------	--
[[0.20689655]
[0.20689655]
[0.20689655]
[0.20689655]
[0.20689655]
[0.20689655]]
#NAME?	aching-----	--
41
#NAME?	ngly Approa	ching------	--
[[0.20689655]
[0.20689655]
[0.20689655]
[0.20689655]
[0.20689655]
[0.20689655]]
#NAME?	aching-----	--
42
#NAME?	ngly Approa	ching------	--
[[0.20689655]
[0.20689655]
[0.20689655]
[0.20689655]
[0.20689655]
[0.20689655]]
#NAME?	aching-----	--
43
#NAME?	ngly Approa	ching------	--
[[0.20689655]
[0.20689655]
[0.20689655]
[0.20689655]
[0.20689655]
[0.20689655]]
#NAME?	aching-----	--
44
#NAME?	ngly Approa	ching------	--
[[0.20689655]
[0.20689655]
[0.20689655]
[0.20689655]
[0.20689655]
[0.20689655]]
#NAME?	aching-----	--
45
#NAME?	ngly Approa	ching------	--
[[0.20689655]
[0.20689655]
[0.20689655]
[0.20689655]
[0.20689655]
[0.20689655]]
#NAME?	aching-----	--
46
#NAME?	ngly Approa	ching------	--
[[0.20689655]
[0.20689655]
[0.20689655]
[0.20689655]
[0.20689655]
[0.20689655]]
#NAME?	aching-----	--
47
#NAME?	ngly Approa	ching------	--
[[0.20689655]
[0.20689655]
[0.20689655]
[0.20689655]
[0.20689655]
[0.20689655]]
#NAME?	aching-----	--
48
#NAME?	ngly Approa	ching------	--
[[0.20689655]
[0.20689655]
[0.20689655]
[0.20689655]
[0.20689655]
[0.20689655]]
#NAME?	aching-----	--
49
#NAME?	ngly Approa	ching------	--
[[0.20689655]
[0.20689655]
[0.20689655]
[0.20689655]
[0.20689655]
[0.20689655]]
GPOC STRONGLY APPROACHING TRANSITI	ON MODEL CO	NVERGED SUC	CESSFULLY
#NAME?	LY APPROACH	ING--------	--------------
[[0.37737036 0.20354067 0.26899808	0.033915	0.0814099	0.03476594]
[0.39914484 0.2123116 0.26237696	0.0293464	0.0594536	0.03736665]
[0.40397608 0.21815457 0.26675586	0.0221112	0.051838	0.0371643 ]
[0.28510894 0.17455297 0.37380541	0.129545	0.014876	0.02211119]
[0.32601523 0.19642026 0.29255085	0.00743802	0.151657	0.02591899]
[0.28510894 0.17455297 0.37380541	0.129545	0.014876	0.02211119]]
[[0]
[0]
[0]
[1]
[0]
[0]]
#NAME?	ng Matrix--	-------
0
#NAME?	erately App	roaching---	----
[[0.03391503]
[0.02934636]
[0.02211119]
[0.12954545]
[0.00743802]
[0.12954545]]
#NAME?	ng Matrix--	-------
1
#NAME?	erately App	roaching---	----
[[0.03422241]
[0.03465363]
[0.03406564]
[0.04281433]
[0.02873896]
[0.04281433]]
#NAME?	ng Matrix--	-------
2
#NAME?	erately App	roaching---	----
[[0.0344117 ]
[0.03452001]
[0.0344997 ]
[0.03546053]
[0.03371625]
[0.03546053]]
#NAME?	ng Matrix--	-------
3
#NAME?	erately App	roaching---	----
[[0.03447284]
[0.03448641]
[0.03448492]
[0.03461222]
[0.03438824]
[0.03461222]]
#NAME?	ng Matrix--	-------
4
#NAME?	erately App	roaching---	----
[[0.03448154]
[0.03448316]
[0.0344829 ]
[0.03449961]
[0.03447086]
[0.03449961]]
#NAME?	ng Matrix--	-------
5
#NAME?	erately App	roaching---	----
[[0.03448261]
[0.03448281]
[0.03448277]
[0.03448491]
[0.03448124]
[0.03448491]]
#NAME?	ng Matrix--	-------
6
#NAME?	erately App	roaching---	----
[[0.03448274]
[0.03448277]
[0.03448276]
[0.03448303]
[0.03448256]
[0.03448303]]
#NAME?	ng Matrix--	-------
7
#NAME?	erately App	roaching---	----
[[0.03448276]
[0.03448276]
[0.03448276]
[0.03448279]
[0.03448273]
[0.03448279]]
#NAME?	ng Matrix--	-------
8
#NAME?	erately App	roaching---	----
[[0.03448276]
[0.03448276]
[0.03448276]
[0.03448276]
[0.03448276]
[0.03448276]]
#NAME?	ng Matrix--	-------
9
#NAME?	erately App	roaching---	----
[[0.03448276]
[0.03448276]
[0.03448276]
[0.03448276]
[0.03448276]
[0.03448276]]
#NAME?	ng Matrix--	-------
10
#NAME?	erately App	roaching---	----
[[0.03448276]
[0.03448276]
[0.03448276]
[0.03448276]
[0.03448276]
[0.03448276]]
#NAME?	ng Matrix--	-------
11
#NAME?	erately App	roaching---	----
[[0.03448276]
[0.03448276]
[0.03448276]
[0.03448276]
[0.03448276]
[0.03448276]]
#NAME?	ng Matrix--	-------
12
#NAME?	erately App	roaching---	----
[[0.03448276]
[0.03448276]
[0.03448276]
[0.03448276]
[0.03448276]
[0.03448276]]
#NAME?	ng Matrix--	-------
13
#NAME?	erately App	roaching---	----
[[0.03448276]
[0.03448276]
[0.03448276]
[0.03448276]
[0.03448276]
[0.03448276]]
#NAME?	ng Matrix--	-------
14
#NAME?	erately App	roaching---	----
[[0.03448276]
[0.03448276]
[0.03448276]
[0.03448276]
[0.03448276]
[0.03448276]]
#NAME?	ng Matrix--	-------
15
#NAME?	erately App	roaching---	----
[[0.03448276]
[0.03448276]
[0.03448276]
[0.03448276]
[0.03448276]
[0.03448276]]
#NAME?	ng Matrix--	-------
16
#NAME?	erately App	roaching---	----
[[0.03448276]
[0.03448276]
[0.03448276]
[0.03448276]
[0.03448276]
[0.03448276]]
#NAME?	ng Matrix--	-------
17
#NAME?	erately App	roaching---	----
[[0.03448276]
[0.03448276]
[0.03448276]
[0.03448276]
[0.03448276]
[0.03448276]]
#NAME?	ng Matrix--	-------
18
#NAME?	erately App	roaching---	----
[[0.03448276]
[0.03448276]
[0.03448276]
[0.03448276]
[0.03448276]
[0.03448276]]
#NAME?	ng Matrix--	-------
19
#NAME?	erately App	roaching---	----
[[0.03448276]
[0.03448276]
[0.03448276]
[0.03448276]
[0.03448276]
[0.03448276]]
#NAME?	ng Matrix--	-------
20
#NAME?	erately App	roaching---	----
[[0.03448276]
[0.03448276]
[0.03448276]
[0.03448276]
[0.03448276]
[0.03448276]]
#NAME?	ng Matrix--	-------
21
#NAME?	erately App	roaching---	----
[[0.03448276]
[0.03448276]
[0.03448276]
[0.03448276]
[0.03448276]
[0.03448276]]
#NAME?	ng Matrix--	-------
22
#NAME?	erately App	roaching---	----
[[0.03448276]
[0.03448276]
[0.03448276]
[0.03448276]
[0.03448276]
[0.03448276]]
#NAME?	ng Matrix--	-------
23
#NAME?	erately App	roaching---	----
[[0.03448276]
[0.03448276]
[0.03448276]
[0.03448276]
[0.03448276]
[0.03448276]]
#NAME?	ng Matrix--	-------
24
#NAME?	erately App	roaching---	----
[[0.03448276]
[0.03448276]
[0.03448276]
[0.03448276]
[0.03448276]
[0.03448276]]
#NAME?	ng Matrix--	-------
25
#NAME?	erately App	roaching---	----
[[0.03448276]
[0.03448276]
[0.03448276]
[0.03448276]
[0.03448276]
[0.03448276]]
#NAME?	ng Matrix--	-------
26
#NAME?	erately App	roaching---	----
[[0.03448276]
[0.03448276]
[0.03448276]
[0.03448276]
[0.03448276]
[0.03448276]]
#NAME?	ng Matrix--	-------
27
#NAME?	erately App	roaching---	----
[[0.03448276]
[0.03448276]
[0.03448276]
[0.03448276]
[0.03448276]
[0.03448276]]
#NAME?	ng Matrix--	-------
28
#NAME?	erately App	roaching---	----
[[0.03448276]
[0.03448276]
[0.03448276]
[0.03448276]
[0.03448276]
[0.03448276]]
#NAME?	ng Matrix--	-------
29
#NAME?	erately App	roaching---	----
[[0.03448276]
[0.03448276]
[0.03448276]
[0.03448276]
[0.03448276]
[0.03448276]]
#NAME?	ng Matrix--	-------
30
#NAME?	erately App	roaching---	----
[[0.03448276]
[0.03448276]
[0.03448276]
[0.03448276]
[0.03448276]
[0.03448276]]
#NAME?	ng Matrix--	-------
31
#NAME?	erately App	roaching---	----
[[0.03448276]
[0.03448276]
[0.03448276]
[0.03448276]
[0.03448276]
[0.03448276]]
#NAME?	ng Matrix--	-------
32
#NAME?	erately App	roaching---	----
[[0.03448276]
[0.03448276]
[0.03448276]
[0.03448276]
[0.03448276]
[0.03448276]]
#NAME?	ng Matrix--	-------
33
#NAME?	erately App	roaching---	----
[[0.03448276]
[0.03448276]
[0.03448276]
[0.03448276]
[0.03448276]
[0.03448276]]
#NAME?	ng Matrix--	-------
34
#NAME?	erately App	roaching---	----
[[0.03448276]
[0.03448276]
[0.03448276]
[0.03448276]
[0.03448276]
[0.03448276]]
#NAME?	ng Matrix--	-------
35
#NAME?	erately App	roaching---	----
[[0.03448276]
[0.03448276]
[0.03448276]
[0.03448276]
[0.03448276]
[0.03448276]]
#NAME?	ng Matrix--	-------
36
#NAME?	erately App	roaching---	----
[[0.03448276]
[0.03448276]
[0.03448276]
[0.03448276]
[0.03448276]
[0.03448276]]
#NAME?	ng Matrix--	-------
37
#NAME?	erately App	roaching---	----
[[0.03448276]
[0.03448276]
[0.03448276]
[0.03448276]
[0.03448276]
[0.03448276]]
#NAME?	ng Matrix--	-------
38
#NAME?	erately App	roaching---	----
[[0.03448276]
[0.03448276]
[0.03448276]
[0.03448276]
[0.03448276]
[0.03448276]]
#NAME?	ng Matrix--	-------
39
#NAME?	erately App	roaching---	----
[[0.03448276]
[0.03448276]
[0.03448276]
[0.03448276]
[0.03448276]
[0.03448276]]
#NAME?	ng Matrix--	-------
40
#NAME?	erately App	roaching---	----
[[0.03448276]
[0.03448276]
[0.03448276]
[0.03448276]
[0.03448276]
[0.03448276]]
#NAME?	ng Matrix--	-------
41
#NAME?	erately App	roaching---	----
[[0.03448276]
[0.03448276]
[0.03448276]
[0.03448276]
[0.03448276]
[0.03448276]]
#NAME?	ng Matrix--	-------
42
#NAME?	erately App	roaching---	----
[[0.03448276]
[0.03448276]
[0.03448276]
[0.03448276]
[0.03448276]
[0.03448276]]
#NAME?	ng Matrix--	-------
43
#NAME?	erately App	roaching---	----
[[0.03448276]
[0.03448276]
[0.03448276]
[0.03448276]
[0.03448276]
[0.03448276]]
#NAME?	ng Matrix--	-------
44
#NAME?	erately App	roaching---	----
[[0.03448276]
[0.03448276]
[0.03448276]
[0.03448276]
[0.03448276]
[0.03448276]]
#NAME?	ng Matrix--	-------
45
#NAME?	erately App	roaching---	----
[[0.03448276]
[0.03448276]
[0.03448276]
[0.03448276]
[0.03448276]
[0.03448276]]
#NAME?	ng Matrix--	-------
46
#NAME?	erately App	roaching---	----
[[0.03448276]
[0.03448276]
[0.03448276]
[0.03448276]
[0.03448276]
[0.03448276]]
#NAME?	ng Matrix--	-------
47
#NAME?	erately App	roaching---	----
[[0.03448276]
[0.03448276]
[0.03448276]
[0.03448276]
[0.03448276]
[0.03448276]]
#NAME?	ng Matrix--	-------
48
#NAME?	erately App	roaching---	----
[[0.03448276]
[0.03448276]
[0.03448276]
[0.03448276]
[0.03448276]
[0.03448276]]
#NAME?	ng Matrix--	-------
49
#NAME?	erately App	roaching---	----
[[0.03448276]
[0.03448276]
[0.03448276]
[0.03448276]
[0.03448276]
[0.03448276]]
GPOC MODERATELY APPROACHING TRANSI	TION MODELC	ONVERGED SU	CCESSFULLY
#NAME?	PPROACHING-	-----------	----------
[[0.37737036 0.20354067 0.26899808	0.033915	0.0814099	0.03476594]
[0.39914484 0.2123116 0.26237696	0.0293464	0.0594536	0.03736665]
[0.40397608 0.21815457 0.26675586	0.0221112	0.051838	0.0371643 ]
[0.28510894 0.17455297 0.37380541	0.129545	0.014876	0.02211119]
[0.32601523 0.19642026 0.29255085	0.00743802	0.151657	0.02591899]
[0.28510894 0.17455297 0.37380541	0.129545	0.014876	0.02211119]]
[[0]
[0]
[0]
[0]
[1]
[0]]
#NAME?	rix--------
0
#NAME?	ately Appro	aching-----	-
[[0.08140993]
[0.05945359]
[0.05183799]
[0.01487603]
[0.15165665]
[0.01487603]]
#NAME?	rix--------
1
#NAME?	ately Appro	aching-----	-
[[0.07013529]
[0.06872709]
[0.06842918]
[0.05747792]
[0.07687997]
[0.05747792]]
#NAME?	rix--------
2
#NAME?	ately Appro	aching-----	-
[[0.06906949]
[0.06894525]
[0.06897233]
[0.06743249]
[0.06996023]
[0.06743249]]
#NAME?	rix--------
3
#NAME?	ately Appro	aching-----	-
[[0.06897815]
[0.06896137]
[0.06896561]
[0.06877647]
[0.06909714]
[0.06877647]]
#NAME?	rix--------
4
#NAME?	ately Appro	aching-----	-
[[0.0689672 ]
[0.06896492]
[0.06896536]
[0.06894172]
[0.0689825 ]
[0.06894172]]
#NAME?	rix--------
5
#NAME?	ately Appro	aching-----	-
[[0.06896574]
[0.06896544]
[0.06896549]
[0.06896248]
[0.06896768]
[0.06896248]]
#NAME?	rix--------
6
#NAME?	ately Appro	aching-----	-
[[0.06896555]
[0.06896551]
[0.06896551]
[0.06896513]
[0.06896579]
[0.06896513]]
#NAME?	rix--------
7
#NAME?	ately Appro	aching-----	-
[[0.06896552]
[0.06896552]
[0.06896552]
[0.06896547]
[0.06896555]
[0.06896547]]
#NAME?	rix--------
8
#NAME?	ately Appro	aching-----	-
[[0.06896552]
[0.06896552]
[0.06896552]
[0.06896551]
[0.06896552]
[0.06896551]]
#NAME?	rix--------
9
#NAME?	ately Appro	aching-----	-
[[0.06896552]
[0.06896552]
[0.06896552]
[0.06896552]
[0.06896552]
[0.06896552]]
#NAME?	rix--------
10
#NAME?	ately Appro	aching-----	-
[[0.06896552]
[0.06896552]
[0.06896552]
[0.06896552]
[0.06896552]
[0.06896552]]
#NAME?	rix--------
11
#NAME?	ately Appro	aching-----	-
[[0.06896552]
[0.06896552]
[0.06896552]
[0.06896552]
[0.06896552]
[0.06896552]]
#NAME?	rix--------
12
#NAME?	ately Appro	aching-----	-
[[0.06896552]
[0.06896552]
[0.06896552]
[0.06896552]
[0.06896552]
[0.06896552]]
#NAME?	rix--------
13
#NAME?	ately Appro	aching-----	-
[[0.06896552]
[0.06896552]
[0.06896552]
[0.06896552]
[0.06896552]
[0.06896552]]
#NAME?	rix--------
14
#NAME?	ately Appro	aching-----	-
[[0.06896552]
[0.06896552]
[truncated: 1,249 more rows]

## Sheet: Table 7
Shapiro-Wilk Wtest for normal data
Variable	Obs	W	V	z	Prob>z
gpocready	20	0.82273	4.196	2.89	0.00192
gpocwelcom~g	20	0.75055	5.905	3.579	0.00017
stronglyap~c	20	0.8547	3.439	2.489	0.0064
moderatlya~c	20	0.8872	2.67	1.979	0.0239
weaklyappr~c	20	0.84378	3.698	2.635	0.0042
Shapiro-Fran W' test for normal data
Variable	Obs	W'	V'	z	Prob>z
gpocready	20	0.90169	2.586	1.701	0.04445
gpocwelcom~g	20	0.73943	6.856	3.446	0.00028
stronglyap~c	20	0.98352	0.434	-1.496	0.93269
moderatlya~c	20	0.98648	0.356	-1.851	0.96792
weaklyappr~c	20	0.97849	0.566	-1.019	0.84593
Skewness/Kurtosis tests for Normality
Variable	Obs	Pr(Skewness)	Pr(Kurtosis)	adj chi2(2)	Prob>chi2
gpocready	20	0.081	0.5474	3.77	0.0015
gpocwelcom~g	20	0.0005	0.0071	14.25	0.0008
stronglyap~c	20	0.3431	0.0212	5.82	0.0544
moderatlya~c	20	0.3462	0.0177	6.04	0.0489
weaklyappr~c	20	0.1834	0.1389	4.19	0.0012
	Table 7: Normality tests for the Non-fiscal model of the GPOC, the Shapiro-Fran Wilks test which demonstrates that the domains of GPOC approaching is normally distributed; skewness and kurtosis tests support that all data are normally distributed falling between the ranges of -2 and +2. see ref 66, 67
